1 **Transcriptomics reveals the mycoparasitic strategy of the mushroom *Entoloma***  
2 ***abortivum* on species of the mushroom *Armillaria***

3

4 Running title: Mycoparasitism of *Entoloma abortivum*

5

6 Rachel A. Koch<sup>1</sup> and Joshua R. Herr<sup>1,2,#</sup>

7

8 <sup>1</sup>Department of Plant Pathology, University of Nebraska, Lincoln, NE 68503, USA;

9 <sup>2</sup>Center for Plant Science Innovation, University of Nebraska, Lincoln, NE 68588, USA;

10 #Correspondence: Joshua R. Herr ([jherr@unl.edu](mailto:jherr@unl.edu))

11

12 Abstract word count (including abstract and importance): 363

13 Text word count: 4938

14

15

16

17

18

19

20

21

22

23

24

25 **ABSTRACT**

26 During mycoparasitism, a fungus—the host—is parasitized by another fungus—the  
27 mycoparasite . The genetic underpinnings of these relationships have been best  
28 characterized in Ascomycete fungi. However, within Basidiomycete fungi, there are rare  
29 instances of mushroom-forming species parasitizing the reproductive structures, or  
30 sporocarps, of other mushroom-forming species. One of the most enigmatic of these  
31 occurs between *Entoloma abortivum* and species of *Armillaria*, where hyphae of *E.*  
32 *abortivum* are hypothesized to disrupt the development of *Armillaria* sporocarps,  
33 resulting in the formation of carpophoroids. However, it remains unknown whether  
34 carpophoroids are the direct result of a mycoparasitic relationship. To address the  
35 nature of this unique interaction, we analyzed gene expression of field-collected  
36 *Armillaria* and *E. abortivum* sporocarps and carpophoroids. Transcripts in the  
37 carpophoroids are primarily from *E. abortivum*, supporting the hypothesis that this  
38 species is parasitizing *Armillaria*. Most notably, we identified differentially expressed *E.*  
39 *abortivum*  $\beta$ -trefoil-type lectins in the carpophoroid, which we hypothesize bind to  
40 *Armillaria* cell wall galactomannoproteins, thereby mediating recognition between the  
41 mycoparasite and the host. The most significantly upregulated *E. abortivum* transcripts  
42 in the carpophoroid code for oxalate decarboxylases—enzymes that degrade oxalic  
43 acid. Oxalic acid is a virulence factor in many plant pathogens, including *Armillaria*  
44 species, however, *E. abortivum* has evolved a sophisticated strategy to overcome this  
45 defense mechanism. The number of gene models and genes that code for  
46 carbohydrate-active enzymes in the *E. abortivum* transcriptome were reduced

47 compared to other closely related species, perhaps as a result of the specialized nature  
48 of this interaction.

49

## 50 **IMPORTANCE**

51 By studying fungi that parasitize other fungi, we can understand the basic biology of  
52 these unique interactions. Studies focused on the genetic mechanisms regulating  
53 mycoparasitism between host and parasite have thus far concentrated on a single  
54 fungal lineage within the Ascomycota. The work presented here expands our  
55 understanding of mycoparasitic relationships to the Basidiomycota, and represents the  
56 first transcriptomic study to our knowledge that examines fungal-fungal relationships in  
57 their natural setting. The results presented here suggest that even distantly related  
58 mycoparasites utilize similar mechanisms to kill their host. Given that species of the  
59 mushroom-forming pathogen *Armillaria* cause plant root-rot diseases in many  
60 agroecosystems, an enhanced understanding of this interaction may contribute to better  
61 control of these diseases through biocontrol applications.

62

63

64

65

66

67

68

69

## 70 INTRODUCTION

71 Fungal mycoparasitism is a nutritional strategy where a living fungus—the host—is  
72 parasitized by and acts as a nutrient source for another fungus—the mycoparasite.  
73 Certain species of fungi in the Hypocreales (Ascomycota) are among the best-studied  
74 mycoparasites. Perhaps the most well-known of these are species of *Trichoderma* and  
75 *Clonostachys rosea*, which have biocontrol activity against plant pathogenic species of  
76 *Botrytis*, *Fusarium*, *Pythium*, and *Rhizoctonia* (1, 2). Other fungal mycoparasites in the  
77 Hypocreales include *Tolyposcladium* species, many of which are parasites on the  
78 reproductive structures, or sporocarps, of species in the genus *Elaphomyces*  
79 (Eurotiales, Ascomycota) (3), as well as *Escovopsis weberi*, which is a specialized  
80 necrotrophic parasite of fungal gardens of attine ants (4, 5).

81 Less studied examples of mycoparasitism involve mushroom-forming fungi that  
82 parasitize other mushroom-forming fungi. Fewer than 20 reported mushroom species  
83 are capable of engaging in this type of interaction, making it an incredibly rare  
84 phenomenon given the total number of mushroom-forming fungi (6, 7). Examples of this  
85 interaction include *Volvariella surrecta*, which fruits from the pileus of its host, *Clitocybe*  
86 *nebularis* (8), which appears to remain unaffected by its parasite (7). More commonly,  
87 though, mushroom mycoparasites deform host sporocarps and likely prevent the  
88 dispersal of their spores. *Pseudoboletus parasiticus* fruits from the sporocarps of  
89 *Scleroderma* species, which, after infection, are no longer able to mature and disperse  
90 their spores (9). *Psathyrella epimyces* causes the deformation of sporocarp tissue of its  
91 host, *Coprinus comatus* (10). Additionally, of the ten mushroom species in the genus

92 *Squamanita*, all are known to be parasites of sporocarps of species in the genera  
93 *Cystoderma*, *Galerina*, *Hebeloma*, and *Inocybe* (7).

94 One of the most commonly encountered putative mycoparasitic interactions  
95 between two mushrooms involves species of *Armillaria* (Fig. 1A) and *Entoloma*  
96 *abortivum* (Fig. 1B). *Entoloma abortivum* is often encountered fruiting in soil, humus, or  
97 decaying logs in deciduous woods (11), while *Armillaria* species are facultative  
98 necrotrophs that can cause root rot in forest and agronomic systems worldwide (12, 13).  
99 Traditionally, *E. abortivum* was thought to exist in two forms: the typical mushroom form,  
100 which has a gray stipe, gray pileus and pink gills (Fig. 1B), and the carpophoroid form,  
101 which is white, subglobose and lacks well-formed gills (Fig. 1C–D). The carpophoroid  
102 form has traditionally been assumed to be *E. abortivum* sporocarps that did not develop  
103 properly due to parasitism by *Armillaria* species (11). However, macro- and microscopic  
104 studies of carpophoroid field collections determined that carpophoroids actually  
105 represent malformed *Armillaria* sporocarps permeated by *E. abortivum* hyphae (14).  
106 Laboratory inoculation experiments showed that *E. abortivum* interacts with *Armillaria*  
107 sporocarps to disrupt their morphological development (14).

108 Whether carpophoroids are the result of a mycoparasitic relationship, where *E.*  
109 *abortivum* serves as the mycoparasite and *Armillaria* species serve as the host, remains  
110 unknown. In order to address this, we initiated a transcriptome study after we  
111 encountered all three components of this system fruiting in close proximity—  
112 carpophoroids and individual sporocarps of *E. abortivum* and *Armillaria*. For a  
113 mycoparasite to be successful, there are several crucial steps in the utilization of a  
114 fungal host for nutrition. These steps include: 1) sensing the host; 2) recognition and

115 attachment to host hypha; 3) initiating defense responses; and 4) the eventual demise  
116 of the host (15). Previous genomic and transcriptomic studies elucidated the genetic  
117 machinery that model mycoparasites utilize during each of these steps (15–17). In this  
118 work, we used transcriptomic and meta-transcriptomic techniques to analyze the  
119 genomic toolbox of *E. abortivum* and *Armillaria* during the carpophoroid stage. We show  
120 that the gene expression profiles of *E. abortivum* resemble those of known  
121 mycoparasitic species, as well as predict certain genes in both species that facilitate this  
122 interaction. Additionally, we used transcriptomic information to determine the species of  
123 *Armillaria* involved in this association.

124

## 125 **RESULTS**

126 ***Transcriptome assemblies of Entoloma abortivum and Armillaria.*** In order to  
127 benchmark gene diversity and baseline expression levels of the field-collected  
128 mushroom species in our study, we sequenced the sporocarp transcriptomes of *E.*  
129 *abortivum* and the *Armillaria* species found in close proximity to the carpophoroids. To  
130 date, there are several transcriptomic studies of *Armillaria* species (18, 19), but none for  
131 any *Entoloma* species. The assembled transcriptome of *E. abortivum* was just under  
132 120 million base pairs. There were a total of 43,599 contigs and an N50 value of 3,527;  
133 94.5% of benchmark universal single-copy orthologs (BUSCOs) from the Agaricales  
134 were present in the *E. abortivum* transcriptome. A large number of contigs represented  
135 duplicated gene models with potential splice variation. Within the contigs, a total of  
136 9,728 unique gene models were recovered in the transcriptome assembly (Fig. 2) with  
137 603 genes differentially expressed in the carpophoroid tissue and 403 genes

138 differentially expressed in the sporocarp tissue (Fig. 3). The transcriptome contained  
139 195 genes that code for carbohydrate-active enzymes (CAZymes). The transcriptome  
140 lacks any genes that code for cellobiohydrolases (GH6 and GH7), xylanases (GH10,  
141 GH11, GH30) and auxiliary proteins like polysaccharide monoxygenases (GH61), but  
142 does contain nine chitinases (GH18) (Fig. 2). Genes detected in the *E. abortivum*  
143 transcriptome that might be important in mycoparasitic interactions include: ten putative  
144 secondary metabolite gene clusters, one G-coupled protein receptor (GCPR), 38 ATP-  
145 binding cassette (ABC) transporters and 113 genes from the major facilitator  
146 superfamily (MFS) (Fig. 3). The average gene expression (in normalized units of  
147 trimmed mean of m-values (TMM)) of the ten most highly expressed *E. abortivum* genes  
148 in the sporocarp ranged from 4,333 to 17,890. Information about the ten most highly  
149 expressed transcripts in the sporocarps is available in Table 1.

150         The assembled transcriptome of *Armillaria* was just over 138 million base pairs.  
151 There were a total of 63,905 contigs, an N50 value of 2,845, and 97.8% of the BUSCOs  
152 representative of the Agaricales were present in the transcriptome. Again, a large  
153 number of the contigs represented duplicated gene models with potential splice  
154 variation. A total of 38,215 unique gene models were recovered (Fig. 2) and 2,619  
155 transcripts were differentially expressed in the carpophoroid tissue, whereas 9,820 were  
156 differentially expressed in the sporocarp tissue (Fig. 3). The transcriptome contained  
157 580 genes that code for CAZymes, with 34 of those coding for chitinases (Fig. 2).  
158 Genes detected in the *Armillaria* transcriptome that might be important in mycoparasitic  
159 interactions include: 12 putative secondary metabolite gene clusters, five GCPRs, 59  
160 ABC transporters and 144 MFS transcripts (Fig. 3). The average TMM of the ten most

161 highly expressed *Armillaria* genes in the sporocarp ranged from 8,438 to 36,477. The  
162 most highly expressed gene was annotated as a cell wall galactomannoprotein (Fig. 4  
163 and 5) (Table 2), while, notably, the fourteenth most highly expressed gene in the  
164 sporocarp coded for isocitrate lyase (Table 2, Fig. 5).

165

#### 166 **Metatranscriptomic analysis of combined fungal hyphae in carpophoroid tissue.**

167 We sequenced the metatranscriptome of the mixed tissue in the carpophoroids that are  
168 typically found when *E. abortivum* and species of *Armillaria* are found in close proximity.

169 In the carpophoroid tissue, significantly more transcriptomic reads from *E. abortivum*  
170 were identified than from *Armillaria* sp. ( $t_{(8)} = 16.6$ ,  $p = 1.77 \times 10^{-7}$ ,  $n = 9$  replicates per

171 species) (Fig. 6). The average number of *E. abortivum* mapped reads in the

172 carpophoroid tissue was 2,613,988, while the average number of *Armillaria* mapped

173 reads was 74,880 (Fig. 6). Multidimensional scaling (MDS) plots of *E. abortivum* (Fig.

174 7A) and *Armillaria* (Fig. 7B) show that the genetic distance between the *E. abortivum*

175 sporocarps and the carpophoroid is less than the distance between *Armillaria*

176 sporocarps and the carpophoroid.

177 The average TMM of the top ten most highly expressed *E. abortivum* genes in

178 the carpophoroid ranged from 9,075 to 68,720 (Table 1), while the average TMM of the

179 top ten most highly expressed *Armillaria* transcripts in the carpophoroid ranged from

180 300 to 9,049 (Table 2). The first and third most highly expressed *E. abortivum*

181 transcripts in the carpophoroid tissue code for two oxalate decarboxylases, both of

182 which were significantly differentially expressed in the carpophoroid tissue compared to

183 the sporocarp (Figs. 3, 4, 5 and Table 1). There were other differentially expressed *E.*



184 *abortivum* transcripts in the carpophoroid that were not as highly expressed that may  
185 also play a role in mycoparasitism. These include three  $\beta$ -trefoil-type lectins, three ABC  
186 transporters, two chitinases, and 14 MFS transcripts (Fig. 3, Table 1). No transcripts  
187 involved in secondary metabolite gene clusters were differentially expressed in the  
188 carpophoroids (Fig. 3). Opposingly, two *Armillaria* transcripts that code for putative  
189 senescence-associated proteins were significantly expressed in the carpophoroid  
190 compared to the sporocarp as well as a heat shock protein (Table 2).

191  
192 **Phylogenetic placement of *Armillaria* reads.** Phylogenomic analysis of 100  
193 randomly-selected *Armillaria* BUSCOs generated in this study, in conjunction with  
194 previously published *Armillaria* genomes, shows a strongly supported sister relationship  
195 with an *A. mellea* specimen from France (100% BS) (Fig. 8A). Phylogenetic analysis of  
196 all ITS sequences characterized as *A. mellea* from GenBank shows that this specimen  
197 is conspecific with specimens from eastern North American (Fig. 8B).

198

## 199 **DISCUSSION**

200 The formation of carpophoroids associated with species of *E. abortivum* have  
201 traditionally been thought to be the result of an *Armillaria* species attacking and  
202 parasitizing *Entoloma* sporocarps (11), a conclusion drawn based on the fact that  
203 *Armillaria* species are wide-spread forest pathogens (12). However, subsequent studies  
204 have shown the opposite: the production of carpophoroids are the result of *E. abortivum*  
205 disrupting the development of *Armillaria* sporocarps (14). Here, we employed RNA  
206 sequencing and differential gene expression analysis on field-collected fungal tissue of

207 each of the three components of this association to better understand the mechanistic  
208 basis of this interaction. We determined that *E. abortivum* reads in the  
209 metatranscriptome of the carpophoroid tissue—which can be interpreted as a measure  
210 of living tissue—are almost 35 times more abundant in the carpophoroid tissue  
211 compared to *A. mellea* reads (Fig. 6). This finding suggests that carpophoroids are  
212 structures that result from *E. abortivum* parasitizing, and eventually killing, its *Armillaria*  
213 host under natural conditions. Additionally, the genetic differences between  
214 carpophoroids and sporocarps is much smaller for *E. abortivum* than for *Armillaria* (Figs.  
215 3, 4, and 7) , which could be suggestive that mycoparasitism is part of the life history of  
216 *E. abortivum* and fewer genetic shifts are necessary to transition between the  
217 carpophoroid and sporocarp.

218 Fungal-fungal necrotrophic mycoparasitic interactions are multistage processes  
219 that are best studied in model species, such as those in the genera *Trichoderma*,  
220 *Coniothyrium*, *Clonostachys* and *Tolyposcladium* (17). Genomic and transcriptomic  
221 studies of necrotrophic mycoparasites show a convergence of significant genetic  
222 mechanisms at each stage (17). The *E. abortivum* genes that are upregulated with  
223 statistical significance in the carpophoroid tissue are largely consistent with other  
224 examples of necrotrophic mycoparasites in the Ascomycota. In the carpophoroid tissues  
225 we analyzed, *E. abortivum* appears to employ much of its energy on recognition and  
226 defense responses (Fig. 5). Inversely, the *Armillaria* sporocarps we analyzed illuminate  
227 possible mechanisms by which these two species recognize one another and how  
228 *Armillaria* responds to parasitism (Fig. 5).

229

230 ***The genetics of the Entoloma-Armillaria mycoparasitic interaction.*** A crucial step in  
231 a successful mycoparasite's life history is the ability to sense its host. Genes involved in  
232 the recognition of the fungal prey include those that code for GPCRs (15, 17). However,  
233 we did not find any of these genes that were differentially expressed by *E. abortivum* in  
234 the carpophoroid tissue (Fig. 3). Given the significantly fewer number of *Armillaria* reads  
235 in the carpophoroid tissue compared to *E. abortivum*, we presume that these  
236 carpophoroids are relatively advanced in age, and expression of the genes used for  
237 sensing the presence of the host are no longer necessary.

238 We also identified three *E. abortivum* genes that code for  $\beta$ -trefoil-type lectins—  
239 proteins that bind to galactose units of sugar chains (20)—that were significantly  
240 upregulated in the carpophoroid tissue (Figs. 3 and 5). In *Trichoderma* species, the  
241 recognition, attachment, and coiling around a fungal substrate is dependent on the  
242 recognition of lectins expressed by the fungal host (21, 22). Interestingly, the most  
243 abundant and differentially expressed gene produced in the *Armillaria* sporocarps, the  
244 substrate to which *E. abortivum* hyphae attach, codes for a cell wall  
245 galactomannoprotein (Figs. 4 and 5). These proteins belong to a group of  
246 polysaccharides which consist of a mannose backbone with galactose side chains, and  
247 are known to make up a major part of the cell wall of some fungal species (23). This  
248 particular galactomannoprotein appears to be specific to *Armillaria* species. Watling (11)  
249 commented on the highly specific nature of this interaction and that it has only been  
250 documented occurring between *E. abortivum* and *Armillaria* species. One possible  
251 mediator of the specificity of this interaction could be the galactose sugars on the  
252 mannose protein (only known thus far from *Armillaria* species) are the means by which

253 *E. abortivum*  $\beta$ -trefoil-type lectins recognize and attach to its *Armillaria* host. However,  
254 more genome sequencing of other Agaricales species is needed to determine whether  
255 this protein is truly specific to species in the genus *Armillaria*.

256 During mycoparasitic interactions, the fungal host responds by mounting its own  
257 defense, and a successful mycoparasite must be able to cope with this counterattack  
258 (15, 17). Two of the most abundant and significantly upregulated *E. abortivum* genes in  
259 the carpophoroid tissue code for oxalate decarboxylases—enzymes responsible for the  
260 degradation of oxalic acid (OA) (Figs. 3, 4, 5D, Table 1). In at least one known well-  
261 studied mycoparasitic interaction, OA is secreted by the fungal host, *Sclerotinia*  
262 *sclerotiorum*, in reaction to penetration by its mycoparasite, *Coniothyrium minitans*. The  
263 acidic environment created by the secreted OA inhibits conidial germination and  
264 suppresses mycelial growth of *C. minitans* (24). However, *C. minitans* nullifies the  
265 growth-suppressing effects of OA or OA-mediated low pH by degrading the OA (25, 26),  
266 an enzymatic process largely mediated by oxalate decarboxylase. Because of this,  
267 oxalate decarboxylase plays an imperative role in mycoparasitism as OA degradation is  
268 vital for infection of the fungal host (27).

269 The secretion of OA is also a broader defense mechanism employed by some  
270 plant pathogens to compromise the defense responses of the host plant by creating an  
271 acidic environment (28). One of the components of the plant-parasitic arsenal of  
272 *Armillaria* species may be the production of OA (29). One differentially upregulated  
273 gene in *Armillaria* sporocarps is isocitrate lyase (Fig. 5), which is involved with OA  
274 biosynthesis in other fungal pathogens (30, 31). We have two hypotheses for the  
275 upregulation of isocitrate lyase in the apparently asymptomatic *Armillaria* sporocarp

276 tissue. An explanation might be that isocitrate lyase is more upregulated in situations  
277 where *Armillaria* is in contact with a plant host and OA biosynthesis is high. One might  
278 also suggest that *Armillaria* is monitoring the close proximity of *E. abortivum* and it is  
279 preemptively launching a defense before hyphal contact is made. However, the  
280 upregulation of oxalate decarboxylases by *E. abortivum* suggests it has evolved a  
281 sophisticated strategy to inactivate the potentially lethal defenses of *Armillaria* exhibited  
282 by the subsequent downregulation of isocitrate lyase in the carpophoroid tissue (Fig. 5).

283 Other ways that mycoparasites cope with the counterattack launched by their  
284 host include actively extruding host-secreted toxins. Here, we hypothesize that active  
285 extrusion of toxins secreted by the host occurs in the *E. abortivum* carpophoroid tissue  
286 via membrane transporters in the ABC superfamily (32–34). Three ABC transporters  
287 were differentially expressed in the carpophoroid tissue (Fig. 3). Another group of genes  
288 that were differentially expressed by *E. abortivum* in the carpophoroid belong to the  
289 major facilitator superfamily (MFS) transporters (Fig. 3). In *C. rosea*, there was selection  
290 for genes in this family that were related to drug resistance, and the transport of  
291 secondary metabolites, small organic compounds and carbohydrates (35). Their  
292 importance to mycoparasitism in *C. rosea* is predicted to invoke efflux-mediated  
293 protection against exogenous or endogenous secondary metabolites and nutrient  
294 uptake (35). MFS transporters have also been shown to be induced in other  
295 mycoparasitic species (16, 36), but their exact biological roles have not been  
296 investigated.

297 In mycoparasitism, the final death of the host often results from the synergistic  
298 actions of cell wall-hydrolytic enzymes and antifungal secondary metabolites (15, 17).

299 No secondary metabolite gene clusters identified in the *E. abortivum* transcriptome were  
300 significantly upregulated in the carpophoroid tissue (Fig. 3). In some mycoparasitic  
301 relationships, the secretion of secondary metabolites occurs early on in the interaction,  
302 including in *E. weberi*, which secretes toxic compounds that kill the leafcutter ant garden  
303 before contact (5). In culture experiments between *Armillaria* isolates and *E. abortivum*,  
304 the growth of *Armillaria* was severely inhibited by the presence of *E. abortivum* (37).  
305 This suggests that *E. abortivum* may potentially secrete a toxic compound early in the  
306 interaction that inhibits the growth of *Armillaria*. Given that significantly more of the living  
307 tissue in the carpophoroids belonged to *E. abortivum* (Fig. 6), it is possible that much of  
308 the *Armillaria* tissue was killed preceding the full development of the carpophoroid.

309 We hypothesize that the upregulated  $\beta$ -trefoil-type lectin in *E. abortivum* that may  
310 be important in hyphal recognition may also be cytotoxic towards *Armillaria*. This type of  
311 lectin has sequence homology, as well as putative structural similarity, to the B-subunit  
312 of ricin, a toxic protein from the castor bean *Ricinus communis* (38). An array of  $\beta$ -  
313 trefoil-type lectins have been characterized from the sporocarps of the mushroom-  
314 forming species *Clitocybe nebularis* (39), *Coprinus cinerea* (40), *Macrolepiota procera*  
315 (41) and *Boletus edulis* (42). These mushroom lectins exhibit entomotoxic activity (43)  
316 as well as nematotoxic activity (40, 41, 44). Taken together, it is possible that these *E.*  
317 *abortivum*  $\beta$ -trefoil-type lectins may also function as toxins towards *Armillaria*. While the  
318 *E. abortivum* genes coding for these lectins are not in the highest abundance in the  
319 carpophoroid tissue (Fig. 5), this could be because most of the *Armillaria* sporocarp  
320 tissue is already dead and the potential lethal effects of these genes are no longer  
321 necessary.

322 Chitin is an essential polymer in fungal cell walls (45) and is an important target  
323 during mycoparasitic attack (17). Indicative of the importance of chitinases in  
324 mycoparasitic interactions, members of the genus *Trichoderma*, as well as *T.*  
325 *ophioglossoides* and *E. weberi*, have an increased number of genes coding for the  
326 glycoside hydrolase family 18 (16, 46–49). Nine fungal chitinases were detected in the  
327 transcriptome of *E. abortivum*, although only two were differentially expressed in the  
328 carpophoroid tissue (Fig. 3) and were not abundant in comparison to other genes,  
329 suggesting minimal significance at this stage in carpophoroid development. One  
330 possibility for this difference in abundance could be the result of the putatively acidic pH  
331 in the carpophoroid that we infer based on the high gene expression of oxalate  
332 decarboxylases. In *C. minitans*, chitinase activity is positively correlated with ambient  
333 pH ranging from three to eight (50), so it is possible that chitinase activity in *E.*  
334 *abortivum* will increase after a neutral pH is restored.

335 Some of the putatively mycoparasitism-related genes outlined above were also  
336 differentially expressed by *Armillaria* in the carpophoroid tissue. These include genes  
337 that code for MFS, ABC transporters, chitinases, and secondary metabolite gene  
338 clusters (Fig. 3). This suggests that *Armillaria* may be using many of the same genetic  
339 mechanisms to defend itself against parasitism by *E. abortivum*. Additionally, the degree  
340 of expression changes—both in the number of differentially expressed genes and the  
341 log-fold change (logFC)—between the sporocarp and carpophoroid is much greater in  
342 *Armillaria* compared to *E. abortivum* (Fig. 3, 4, 7), which could be a reflection of the  
343 level of defense *Armillaria* is mounting. However, this defense is apparently not enough  
344 to overcome the parasitic adaptations of *E. abortivum*.



345

346 **Gene and CAZyme content of *E. abortivum*.** The number of predicted gene models in  
347 the transcriptome of *E. abortivum* was 9,728, which is markedly fewer than the number  
348 of gene models in the genomes of its closest sequenced relatives (Fig. 2B). Additionally,  
349 relative to other closely related mushroom species, *E. abortivum* also exhibits a strong  
350 reduction in several gene families encoding CAZymes (Fig. 2C), and contains no  
351 cellobiohydrolases, xylanases, or polysaccharide monooxygenases. This is similar to *E.*  
352 *weberi*, which also has a reduced genome and CAZyme repertoire—hypothesized to be  
353 the result of its highly specialized interaction with leafcutter ant gardens (46). Therefore,  
354 it is possible that *E. abortivum* only retained the CAZymes and accessory genes  
355 necessary to interact with *Armillaria* species. While a genome sequence of *E. abortivum*  
356 will be necessary to confirm this reduction, the BUSCO analysis verified that the *E.*  
357 *abortivum* transcriptome contains nearly 95% of the core set of eukaryotic genes.

358 Another possibility for the reduction in CAZymes could be explained by a broader  
359 nutritional strategy employed by *Entoloma* species, some of which form ectomycorrhiza-  
360 like structures on host plant species (51–53). Ectomycorrhizal species have a marked  
361 reduction in CAZymes in comparison to their saprotrophic ancestors (54), which we also  
362 observe with *Tricholoma matsutake* (Fig. 2C). However, microscopic analyses of  
363 *Entoloma* ectomycorrhizae-like structures suggest that some species destroy root  
364 meristems and young root cells, suggestive of a more parasitic relationship (51, 52).  
365 One explanation is that *Entoloma* species are actually parasites of true  
366 ectomycorrhizae. This explanation would also add credence to the evidence that  
367 *Entoloma* species are difficult to culture and are slow growing (53). Additional research



368 to understand the nutritional strategy employed by this lineage will inform us as to  
369 whether fungal parasitism in this group is more common than it is currently understood  
370 to be.

371  
372 **Identity of *Armillaria* species in this interaction.** Phylogenomic analysis of the  
373 *Armillaria* transcripts generated in this study suggest that the *Armillaria* species  
374 parasitized in this particular relationship is sister to an *A. mellea* specimen collected  
375 from western Europe (Fig. 8A). An ITS-based phylogenetic analysis shows the  
376 *Armillaria* specimen collected in this study is conspecific with other *A. mellea* collections  
377 from eastern North America (Fig. 8B). *Armillaria mellea* has previously been identified  
378 as a host of *E. abortivum* (11, 14), but this interaction does not appear specific to just *A.*  
379 *mellea*. Interestingly, *Armillaria* species parasitized by *E. abortivum* appear to be only  
380 those present in Eastern North America and Asia (14, 37, 55).

381  
382 **Conclusions.** Data from this study support the hypothesis that *E. abortivum* is a  
383 mycoparasite of *Armillaria* sporocarps. Three  $\beta$ -trefoil-type lectins are differentially  
384 expressed by *E. abortivum* in the carpophoroid tissue, and we propose that these  
385 lectins mediate recognition with *Armillaria* sporocarps through binding to an *Armillaria*-  
386 specific galactomannoprotein. Additionally, through the use of oxalate decarboxylase, *E.*  
387 *abortivum* is likely defending against the secretion of OA by *Armillaria*. These strategies  
388 employed by *E. abortivum* for recognition and defense are similar to mechanisms  
389 utilized by other mycoparasites, suggesting that even distantly related mycoparasites  
390 utilize similar genetic mechanisms to mediate mycoparasitic interactions. While we were

391 able to speculate about what is occurring during other stages of mycoparasitism (i.e.  
392 sensing the host and killing and consuming the host), future studies using both culture  
393 methods and metatranscriptomics of naturally collected carpophoroids at different life  
394 stages (i.e. younger and older specimens) will be necessary to completely tease apart  
395 the mycoparasitic strategies employed by *E. abortivum*.

396

## 397 **MATERIALS AND METHODS**

398 **Sample collection, preparation, and sequencing.** Sporocarps of *Armillaria* sp., *E.*  
399 *arbotivum*, and the mixed-tissue carpophoroids were observed fruiting in proximity to  
400 one another on 18 September 2015 within the Baker Woodlot and Rajendra Neotropical  
401 Migrant Bird Sanctuary, Michigan State University, East Lansing, MI 48823 (42°42'56.4"  
402 N, 84°28'34.4" W) (collection accession: JRH 2446). Entire sporocarps were collected  
403 and immediately flash frozen in liquid nitrogen and subsequently stored at -80°C. At the  
404 time of processing, three biological replicates of each of the three tissue types  
405 (*Armillaria* sp. sporocarp, *E. abortivum* sporocarp, and carpophoroid), were individually  
406 ground in liquid N<sub>2</sub>. Total RNA was then extracted from the ground tissue using the  
407 Qiagen RNeasy kit (Qiagen Inc., Hilden, Germany) according to manufacturer's  
408 protocol. RNA concentration and quality for each of the samples were assessed on a  
409 DeNovix DS-11 FX Spectrophotometer (DeNovix Inc., Wilmington, DE 19810, USA) and  
410 then shipped directly to the University of Minnesota's Genomics Center  
411 (<https://genomics.umn.edu>). Three technical replicates were sequenced for each  
412 biological replicate. Transcriptomic and metatranscriptomic libraries were constructed  
413 with the TruSeq Standard Total RNA Library Preparation Kit with Ribo-Zero ribosomal

414 reduction following the protocol developed by Schuierer et al. (56). Nucleotide  
415 sequencing was performed on the Illumina HiSeq 2500 System (Illumina Inc., San  
416 Diego, USA) and paired-end RNA sequence reads of 51 bp were generated for further  
417 analysis.

418

419 ***De novo transcriptome assembly, transcript abundance estimation and gene***  
420 ***expression analysis.*** The quality of the raw reads was assessed using FastQC version  
421 0.11.9 (<https://www.bioinformatics.babraham.ac.uk/projects/fastqc>). The range of the  
422 number of reads for each condition are as follows: *E. abortivum* sporocarps ranged from  
423 10,584,302 to 14,473,328; *Armillaria* sporocarps ranged from 11,712,320 to 12,431,979;  
424 and the carpophoroids ranged from 9,146,682 to 12,852,086. Sequencing adaptors  
425 were trimmed and contaminants filtered for each sample using bbduk  
426 (<https://jgi.doe.gov/data-and-tools/bbtools/bb-tools-user-guide/bbduk-guide/>). Prior to  
427 transcriptome assembly, *k-mer* hash sizes were estimated with *khmer* (57). De novo  
428 assemblies were constructed independently for both *Armillaria* sp. and *E. arbotivum*  
429 with Trinity version 2.11.0 (58) using the trimmed reads generated from the respective  
430 sporocarp reads. Assembly statistics for both transcriptomes were generated with  
431 QUAST version 5 (59) and transcriptome completeness was assessed by determining  
432 the percentage of sequenced BUSCOs in each (60).

433 The results of the *de novo* transcriptome assemblies were used as references to  
434 perform sample-specific expression analysis. The trimmed mushroom reads from each  
435 of the nine replicates were mapped against their respective reference transcriptomes  
436 using Bowtie2 (61) followed by calculation of abundance estimates using RSEM (62).

437 The trimmed carpophoroid reads were also subsequently mapped, following the same  
438 protocol as described above, to both the *Armillaria* sp. and *E. abortivum* transcriptomes.  
439 Because of the close phylogenetic relatedness between these two species, and to filter  
440 out poorly aligned reads, we only retained mapped reads for all samples that had a  
441 MAPQ value of 30 and above, which is equivalent to reads that have a 99.9% chance of  
442 hitting the correct match. The R package edgeR (63) and TMM normalization (64) were  
443 used to determine differentially expressed transcripts between: 1) *Armillaria* sporocarps  
444 and carpophoroids, and 2) *E. abortivum* sporocarps and carpophoroids. Genes were  
445 considered differentially expressed if they had a logFC of two or greater and an FDR-  
446 adjusted  $p$ -value, or  $q$ -value, of  $< 0.05$ . All statistical analyses for the packages listed  
447 above were conducted using R version 4.0.3 (<http://www.r-project.org/>).

448 We used SAMtools (65) to determine the number of reads from the  
449 carpophoroids that mapped to our reference transcriptomes of *E. abortivum* and our  
450 particular *Armillaria* species. To understand whether the number of reads that mapped  
451 to the carpophoroids differed significantly between each fungal species, we performed  
452 an  $F$ -test of equality of variances, and then a two-tailed  $t$ -test assuming unequal  
453 variance with a  $p$ -value  $< 0.05$  denoting significance.

454  
455 ***Sporocarp Transcriptome and Carpophoroid Metatranscriptome Annotation.*** We  
456 annotated the *Armillaria* sp. and *E. abortivum* transcriptomes using Trinotate version 3.2  
457 (66). Briefly, the transcripts were translated to coding protein sequences using  
458 TransDecoder version 5.5.0 (<http://transdecoder.github.io>) following identification of the  
459 longest open reading frames. To identify the most likely homologous sequence data, we

460 used *blastx* on the transcripts and *blastp* on the predicted protein sequences (67). Using  
461 the predicted protein sequences, we also ran a HMMER (68) search against the PFAM  
462 database (69) to identify conserved domains that might be suggestive of function. We  
463 also compared these results to currently curated annotation databases such as Gene  
464 Ontology (GO) (70) and Kyoto Encyclopedia of Genes and Genomes (KEGG) (71–73).  
465 Additionally, we used dbCAN2 (74) to annotate the CAZymes present in both species  
466 and compared their CAZy content to other closely related Agaricales species (19, 75–  
467 77). Finally, we used antiSMASH version 5.0 (78) to identify transcripts that belong to  
468 secondary metabolite gene clusters for both *Armillaria* and *E. abortivum*.

469

470 ***Phylogenetic analysis of Armillaria transcripts.*** In order to identify the specific  
471 species of *Armillaria* associated in this relationship, we identified BUSCOs (60) from the  
472 transcriptome of our *Armillaria* sporocarps along with other *Armillaria* and  
473 Physalacriaceae species with previously sequenced genomes (19; 79–81). We  
474 randomly selected 100 BUSCOs to reconstruct a phylogenomic tree from the six  
475 *Armillaria* specimens (19, 79), *Guyanagaster necrorhizus* (81) and *Cylindrobasidium*  
476 *torrendii* (80), which served as the outgroup. Protein-coding sequences were aligned  
477 using MAFFT version 7 (82) and non-informative sites and non-aligning regions were  
478 trimmed with Gblocks (83). The 100 BUSCOs were concatenated into a supermatrix  
479 with 64,436 sites. This supermatrix was used to infer a species tree and branch support  
480 using RAxML-NG (84), using a partitioned WAG+G model, where each data partition  
481 represented an individual BUSCO.

482 To supplement the small number of *Armillaria* species with sequenced genomes,  
483 we also extracted the internal transcribed spacer (ITS) region from our *Armillaria*  
484 transcriptome, including the regions 18S, ITS1, 5.8S, ITS2, and 28S, using ITSx (85).  
485 Given the close relationship of our *Armillaria* species to *A. mellea*, we pulled all *A.*  
486 *mellea* ITS sequences from GenBank that included associated location metadata (86–  
487 100) (Table S1). These sequences were aligned using MAFFT version 7 (82), with  
488 refinements to the alignment performed manually. RAxML-NG (84) was used to  
489 reconstruct this phylogeny. Taxa used to root this phylogeny included *A. gemina*, *A.*  
490 *sinapina*, *A. puiggarii* and *A. luteobubalina*—all members of the sister lineage to *A.*  
491 *mellea fide* (13).

492

493 **Data and code availability.** The raw reads generated during this study have been  
494 deposited in the NCBI Sequence Read Archive under the BioProject PRJNAXXXXXX,  
495 while the assembled transcriptomes have been deposited in the NCBI Transcriptome  
496 Shotgun Assembly Sequencing Database under the records XXXXXXXXXX and  
497 XXXXXXXXX. All other associated data and code are available at  
498 [https://github.com/HerrLab/Koch\\_Arm-Ento\\_2021](https://github.com/HerrLab/Koch_Arm-Ento_2021).

499

## 500 **Acknowledgements**

501 We would like to give special thanks to Andrew Loyd and Eva Skific for providing photos  
502 and to Greg Bonito at Michigan State University and his trusty -80°C freezer for  
503 generously storing sporocarp and carpophoroid tissue until we were able to transport  
504 the tissue to our laboratory. We also want to thank the anonymous reviewers who

505 provided feedback and comments on the initial submission of this manuscript. This work  
506 was completed using the Holland Computing Center of the University of Nebraska,  
507 which receives support from the Nebraska Research Initiative. This research was  
508 directly supported by start-up funding from the University of Nebraska Agricultural  
509 Research Division and the University of Nebraska Office of Research and Economic  
510 Development. Additionally, JRH acknowledges funding from the US National Air &  
511 Space Administration (Grant #80NSSC17K0737), the US National Science Foundation  
512 (EPSCoR Grant #1557417), and US National Institute of Justice (Grant #2017-IJ-CX-  
513 0025), all of which indirectly supported this research through the support of research in  
514 his laboratory. All of the funding agencies had no role in study design, data collection  
515 and interpretation, or the decision to submit the work for publication.

516

#### 517 **Conflict of Interest Statement**

518 On behalf of all authors, the corresponding author states that there is no conflict of  
519 interest.

520

#### 521 **Author Contributions**

522 JRH initiated the work and sampled field collections; RAK extracted RNA from all the  
523 tissue samples and performed all the laboratory work; RAK and JRH performed the  
524 experiments, processed the experimental data, analyzed the data, designed the figures,  
525 and drafted the manuscript.

526

527

528 **REFERENCES**

- 529 1. Zeilinger S, Omann M. 2007. *Trichoderma* biocontrol: signal transduction  
530 pathways involved in host sensing and mycoparasitism. *Gene Regul Syst Bio*  
531 **1**:227–234.
- 532 2. Sun Z-B, Li S-D, Ren Q, Xu J-L, Lu X, Sun M-H. 2020. Biology and applications  
533 of *Clonostachys rosea*. *J Appl Microbiol* **129**:486–495.
- 534 3. Quandt CA, Kepler RM, Gams W, Araújo JPM, Ban S, Evans HC, Hughes D,  
535 Humber R, Hywel-Jones N, Li Z, Luangsa-Ard JJ, Rehner SA, Sanjuan T, Sato  
536 H, Shrestha B, Sung G-H, Yao Y-J, Zare R, Spatafora JW. 2014. Phylogenetic-  
537 based nomenclatural proposals for Ophiocordycipitaceae (Hypocreales) with new  
538 combinations in *Tolypocladium*. *IMA Fungus* **5**:121–134.
- 539 4. Currie CR, Mueller UG, Malloch D. 1999. The agricultural pathology of ant fungus  
540 gardens. *Proc Natl Acad Sci U S A* **96**:7998–8002.
- 541 5. Reynolds HT, Currie CR. 2004. Pathogenicity of *Escovopsis weberi*: the parasite  
542 of the attine ant-microbe symbiosis directly consumes the ant-cultivated fungus.  
543 *Mycologia* **96**:955–959.
- 544 6. Redhead SA, Ammirati JF, Walker GR, Norvell LL, Puccio MB. 1994.  
545 *Squamanita contortipes*, the Rosetta Stone of a mycoparasitic agaric genus. *Can*  
546 *J Bot* **72**:1814–1828.
- 547 7. Griffith GW, Piotr Gajda K, Detheridge AP, Douglas B, Bingham J, Turner A,  
548 Bowmaker V, Evans DA, McAdoo WG, Dentinger BTM. 2019. Strangler  
549 unmasked: Parasitism of *Cystoderma amianthinum* by *Squamanita paradoxa* and  
550 *S. pearsonii*. *Fungal Ecol* **39**:131–141.



- 551 8. Weber R, Webster J. 1996. *Volvariella surrecta*: An uncommon mycoparasite.  
552 *Mycologist* **10**:160.
- 553 9. Both EE. 2006. Personal encounters with the parasitic bolete. *Field Mycol* **7**:1–7.
- 554 10. Buller A. 1924. *Researches on Fungi*. Longmans, London, UK.
- 555 11. Watling R. 1974. Dimorphism in *Entoloma abortivum*. *Bull Soc Linn Lyon, Num*  
556 *Spec* **43**:449–470.
- 557 12. Baumgartner K, Coetzee MPA, Hoffmeister D. 2011. Secrets of the subterranean  
558 pathosystem of *Armillaria*. *Mol Plant Pathol* **12**:515–534.
- 559 13. Koch RA, Wilson AW, Séné O, Henkel TW, Aime MC. 2018. Resolved phylogeny  
560 and biogeography of the root pathogen *Armillaria* and its gasteroid relative,  
561 *Guyanagaster*. *BMC Evol Biol* **17**:33.
- 562 14. Lindner Czederpiltz DL, Volk TJ, Burdsall HH, Jr. 2001. Field observations and  
563 inoculation experiments to determine the nature of the carpophoroids associated  
564 with *Entoloma abortivum* and *Armillaria*. *Mycologia* **93**:841–851.
- 565 15. Druzhinina IS, Seidl-Seiboth V, Herrera-Estrella A, Horwitz BA, Kenerley CM,  
566 Monte E, Mukherjee PK, Zeilinger S, Grigoriev IV, Kubicek CP. 2011.  
567 Trichoderma: the genomics of opportunistic success. *Nat Rev Microbiol* **9**:749–  
568 759.
- 569 16. Quandt CA, Di Y, Elser J, Jaiswal P, Spatafora JW. 2016. Differential expression  
570 of genes involved in host recognition, attachment, and degradation in the  
571 mycoparasite *Tolypocladium ophioglossoides*. *G3* **6**:731–741.
- 572 17. Karlsson M, Atanasova L, Jensen DF, Zeilinger S. 2017. Necrotrophic  
573 mycoparasites and their genomes. *Microbiol Spectr* **5**:FUNK-0016-2016.

- 574 18. Ross-Davis AL, Stewart JE, Hanna JW, Kim MS, Knaus BJ, Cronn R, Rai H,  
575 Richardson BA, McDonald GI, Klopfenstein NB. 2013. Transcriptome of an  
576 *Armillaria* root disease pathogen reveals candidate genes involved in host  
577 substrate utilization at the host–pathogen interface. *For Pathol* **43**:468–477.
- 578 19. Sipos G, Prasanna AN, Walter MC, O’Connor E, Bálint B, Krizsán K, Kiss B,  
579 Hess J, Varga T, Slot J, Riley R, Bóka B, Rigling D, Barry K, Lee J, Mihaltcheva  
580 S, LaButti K, Lipzen A, Waldron R, Moloney NM, Sperisen C, Kredics L,  
581 Vágvölgyi C, Patrignani A, Fitzpatrick D, Nagy I, Doyle S, Anderson JB, Grigoriev  
582 IV, Güldener U, Münsterkötter M, Nagy L. 2017. Genome expansion and lineage-  
583 specific genetic innovations in the forest pathogenic fungi *Armillaria*. *Nat Ecol*  
584 *Evol* **1**:1931–1941.
- 585 20. Dodd RB, Drickamer K. 2001. Lectin-like proteins in model organisms:  
586 implications for evolution of carbohydrate-binding activity. *Glycobiology* **11**:71R–  
587 79R.
- 588 21. Inbar J, Chet I. 1992. Biomimics of fungal cell-cell recognition by use of lectin-  
589 coated nylon fibers. *J Bacteriol* **174**:1055–1059.
- 590 22. Inbar J, Chet I. 1996. The role of lectins in recognition and adhesion of the  
591 mycoparasitic fungus *Trichoderma* spp. to its host. *Adv Exp Med Biol* **408**:229–  
592 231.
- 593 23. Latgé JP, Kobayashi H, Debeaupuis JP, Diaquin M, Sarfati J, Wieruszkeski JM,  
594 Parra E, Bouchara JP, Fournet B. 1994. Chemical and immunological  
595 characterization of the extracellular galactomannan of *Aspergillus fumigatus*.  
596 *Infect Immun* **62**:5424–5433.

- 597 24. Wei SJ, Li GQ, Jiang DH, Wang DB. 2004. Effect of oxalic acid on spore  
598 germination and mycelial growth of the mycoparasite *Coniothyrium minitans*.  
599 *Acta Phytopathol Sin* **34**:199–203.
- 600 25. Ren L, Li GQ, Han YC, Jiang DH, Huang HC. 2007. Degradation of oxalic acid by  
601 *Coniothyrium minitans* and its effects on production and activity of  $\beta$ -1,3-  
602 glucanases of this mycoparasite. *Biol Control* **43**:1–11.
- 603 26. Ren L, Li GQ, Jiang DH. 2010. Characterization of some culture factors affecting  
604 oxalate degradation by the mycoparasite *Coniothyrium minitans*. *J Appl Microbiol*  
605 **108**:173–180.
- 606 27. Zeng L-M, Zhang J, Han Y-C, Yang L, Wu M-d, Jiang D-H, Chen W, Li G-Q.  
607 2014. Degradation of oxalic acid by the mycoparasite *Coniothyrium minitans*  
608 plays an important role in interacting with *Sclerotinia sclerotiorum*. *Environ*  
609 *Microbiol* **16**:2591–2610.
- 610 28. Cessna SG, Sears VE, Dickman MB, Low PS. 2000. Oxalic acid, a pathogenicity  
611 factor for *Sclerotinia sclerotiorum*, suppresses the oxidative burst of the host  
612 plant. *Plant Cell* **12**:2191–2200.
- 613 29. Dumas MT, Boyonoski N, Jeng RS. 1989. Oxalic acid production by species of  
614 *Armillaria* in the boreal mixedwood forest. In: Proc. 7th International Conference  
615 on Root and Butt Rots. 9–16 Aug. 1988, Vernon and Victoria, British Columbia.  
616 Forestry Canada, Pacific Forestry Centre, Victoria, B.C. 680 p. 593–601.
- 617 30. Munir E, Jun Yoon J, Tokimatsu T, Hattori T, Shimada M. 2001. A physiological  
618 role for oxalic acid biosynthesis in the wood-rotting basidiomycete *Fomitopsis*  
619 *palustris*. *Proc Natl Acad Sci U S A* **98**:11126–11130.

- 620 31. Wang Y, Wang Y. 2020. Oxalic acid metabolism contributes to full virulence and  
621 pycnidial development in the poplar canker fungus *Cytospora chrysosperma*.  
622 *Phytopathology* **110**:1319–1325.
- 623 32. Dubey M, Jensen DF, Karlsson M. 2015. The ABC transporter ABCG29 is  
624 involved in H<sub>2</sub>O<sub>2</sub> tolerance and biocontrol traits in the fungus *Clonostachys rosea*.  
625 *Mol Genet Genom* **291**:677–686.
- 626 33. Ruocco M, Lanzuise S, Vinale F, Marra R, Turrà, Lois Woo S, Lorito M. 2009.  
627 Identification of a new biocontrol gene in *Trichoderma atroviride*: the role of an  
628 ABC transporter membrane pump in the interaction with different plant-  
629 pathogenic fungi. *Mol Plant Microbe In* **22**:291–301.
- 630 34. Zhao H, Zhou T, Xie J, Cheng J, Chen T, Jiang D, Fu Y. 2020. Mycoparasitism  
631 illuminated by genome and transcriptome sequencing of *Coniothyrium minitans*,  
632 an important biocontrol fungus of the plant pathogen *Sclerotinia sclerotiorum*.  
633 *Microb Genom* **6**:e000345.
- 634 35. Nygren K, Dubey M, Zapparata A, Iqbal M, Tzelepis GD, Brandström Durling M,  
635 Funck Jensen D, Karlsson M. 2018. The mycoparasitic fungus *Clonostachys*  
636 *rosea* responds with both common and specific gene expression during  
637 interspecific interactions with fungal prey. *Evol Appl* **11**:931–949.
- 638 36. Atanasova L, Le Crom S, Gruber S, Couplier F, Seidl-Seiboth V, Kubick CP,  
639 Druzhinina IS. 2013. Comparative transcriptomics reveals different strategies of  
640 *Trichoderma* mycoparasitism. *BMC Genom* **14**:121.
- 641 37. Cha JY, Igarashi T. 1996. Biological species of *Armillaria* and their mycoparasitic  
642 associations with *Rhodophyllus abortivus* in Hokkaido. *Mycoscience* **37**:25–30.

- 643 38. Tregear JW, Roberts LM. 1992. The lectin gene family of *Ricinus communis*:  
644 Cloning of a functional ricin gene and three lectin pseudogenes. *Plant Mol Biol*  
645 **18**:515–525.
- 646 39. Pohleven J, Obermajer N, Sabotič J, Anžlovar S, Sepčič K, Kos J, Kralj B,  
647 Štrukelj B, Brzin J. 2009. Purification, characterization and cloning of a ricin B-  
648 like lectin from mushroom *Clitocybe nebularis* with antiproliferative activity  
649 against human leukemic T cells. *Biochim Biophys Acta Gen Subj* **1790**:173–181.
- 650 40. Schubert M, Bleuler-Martinez S, Butschi A, Wälti MA, Egloff P, Stutz K, Yan S,  
651 Wilson IBH, Hengartner MO, Aebi M, Allain FHT, Künzler M. 2012. Plasticity of  
652 the  $\beta$ -trefoil protein fold in the recognition and control of invertebrate predators  
653 and parasites by a fungal defence system. *PLoS Pathog* **8**:e1002706.
- 654 41. Žurga S, Pohleven J, Renko M, Bleuler-Martínez S, Sosnowski P, Turk D,  
655 Künzler M, Kos J, Sabotič J. 2014. A novel beta-trefoil lectin from the parasol  
656 mushroom (*Macrolepiota procera*) is nematotoxic. *FEBS J* **281**:3489–3506.
- 657 42. Bovi M, Cenci L, Perduca M, Capaldi S, Carrizo ME, Civiero L, Chiarelli LR,  
658 Galliano M, Monaco HL. 2013. BEL beta-trefoil: a novel lectin with antineoplastic  
659 properties in king bolete (*Boletus edulis*) mushrooms. *Glycobiology* **23**:578–592.
- 660 43. Sabotič J, Ohm RA, Künzler M. 2016. Entomotoxic and nematotoxic lectins and  
661 protease inhibitors from fungal fruiting bodies. *Appl Microbiol Biotechnol* **100**:91–  
662 111.
- 663 44. Pohleven J, Renko M, Magister S, Smith DF, Künzler M, Strukelj B, Turk D, Kos  
664 J, Sabotič J. 2012. Bivalent carbohydrate binding is required for biological activity  
665 of *Clitocybe nebularis* lectin (CNL), the N, N'-diacetyllactosediamine

- 666 (GalNAcbeta1-4GlcNAc, LacdiNAc)-specific lectin from basidiomycete *C.*  
667 *nebularis*. *J Biol Chem* **287**:10602–10612.
- 668 45. Latgé JP. 2007. The cell wall: a carbohydrate armour for the fungal cell. *Mol*  
669 *Microbiol* **66**:279–290.
- 670 46. de Man TJ, Stajich JE, Kubicek CP, Teiling C, Chenthamara K, Atanasova L,  
671 Druzhinina IS, Levenkova N, Birnbaum SS, Barribeau SM, Bozick BA, Suen G,  
672 Currie CR, Gerardo NM. 2016. Small genome of the fungus *Escovopsis weberi*, a  
673 specialized disease agent of ant agriculture. *Proc Natl Acad Sci U S A* **113**:3567–  
674 3572.
- 675 47. Kubicek CP, Herrera-Estrella A, Seidl-Seiboth V, Martinez DA, Druzhinina IS,  
676 Thon M, Zeilinger S, Casas-Flores S, Horwitz BA, Mukherjee PK, Mukherjee M,  
677 Kredics L, Alcaraz LD, Aerts A, Antal Z, Atanasova L, Cervantes-Badillo MG,  
678 Challacombe J, Chertkov O, McCluskey K, Coulpier F, Deshpande N, von  
679 Döhren H, Ebbole DJ, Esquivel-Naranjo EU, Fekete E, Flippi M, Glaser F,  
680 Gómez-Rodríguez EY, Gruber S, Han C, Henrissat B, Hermosa R, Hernández-  
681 Oñate M, Karaffa L, Kostı I, Le Crom S, Lindquist E, Lucas S, Lübeck M, Lübeck  
682 PS, Margeot A, Metz B, Misra M, Nevalainen H, Omann M, Packer N, Perrone G,  
683 Uresti-Rivera EE, Salamov A, Schmoll M, Seiboth B, Shapiro H, Sukno S,  
684 Tamayo-Ramos JA, Tisch D, Wiest A, Wilkinson HH, Zhang M, Coutinho PM,  
685 Kenerley CM, Monte E, Baker SE, Grigoriev IV. 2011. Comparative genome  
686 sequence analysis underscores mycoparasitism as the ancestral life style of  
687 *Trichoderma*. *Genome Biol* **12**:R40.

- 688 48. Ihrmark K, Asmail N, Ubhayasekera W, Melin P, Stenlid J, Karlsson M. 2010.  
689 Comparative molecular evolution of *Trichoderma* chitinases in response to  
690 mycoparasitic interactions. *Evol Bioinform* **6**:1–26.
- 691 49. Xie BB, Qin QL, Shi M, Chen LL, Shu YL, Luo Y, Wang XW, Rong JC, Gong ZT,  
692 Li D, Sun CY, Liu GM, Dong XW, Pang XH, Huang F, Liu W, Chen XL, Zhou BC,  
693 Zhang YZ, Song ZY. 2014. Comparative genomics provides insights into  
694 evolution of *Trichoderma* nutrition style. *Genome Biol Evol* **6**:379–390.
- 695 50. Han Y-C, Li G-Q, Yang L, Jiang D-H. 2011. Molecular cloning, characterization  
696 and expression analysis of a *pacC* homolog in the mycoparasite *Coniothyrium*  
697 *minitans*. *World J Microbiol Biotechnol* **27**:381–391.
- 698 51. Agerer R, Waller K. 1993. Mycorrhizae of *Entoloma saepium*: parasitism or  
699 symbiosis? *Mycorrhiza* **3**:145–154.
- 700 52. Kobayashi H, Hatano K. 2001. A morphological study of the mycorrhiza of  
701 *Entoloma clypeatum* f. *hybridum* on *Rosa multiflora*. *Mycoscience* **42**:83–90.
- 702 53. Shishikura M, Takemura Y, Sotome K, Maekawa N, Nakagiri A, Endo N. 2021.  
703 Four mycelial strains of *Entoloma clypeatum* species complex form  
704 ectomycorrhiza-like roots with *Pyrus betulifolia* seedlings in vitro, and one  
705 develops fruiting bodies 2 months after inoculation. *Mycorrhiza* **31**:31–42.
- 706 54. Kohler A, Kuo A, Nagy LG, Morin E, Barry KW, Buscot F, Canbäck B, Choi C,  
707 Cichocki N, Clum A, Colpaert J, Copeland A, Costa MD, Doré J, Floudas D, Gay  
708 G, Girlanda M, Henrissat B, Herrmann S, Hess J, Högberg N, Johansson T,  
709 Khouja H-R, LaButti K, Lahrmann U, Levasseur A, Lindquist EA, Lipzen A,  
710 Marmeisse R, Martino E, Murat C, Ngan CY, Nehls U, Plett JM, Pringle A, Ohm

711 RA, Perotto S, Peter M, Riley R, Rineau F, Ruytinx J, Salamov A, Shah F, Sun  
712 H, Tarkka M, Tritt A, Veneault-Fourrey C, Zuccaro A, Mycorrhizal Genomics  
713 Initiative Consortium, Tunlid A, Grigoriev IV, Hibbett DS, Martin F. 2015.  
714 Convergent losses of decay mechanisms and rapid turnover of symbiosis genes  
715 in mycorrhizal mutualists. *Nat Genet* **47**:410–415.

716 55. Fukuda M, Nakashima E, Hayashi K, Nagasawa E. 2003. Identification of the  
717 biological species of *Armillaria* associated with *Wynnea* and *Entoloma abortivum*  
718 using PCR-RFLP analysis of the intergenic region (IGR) of ribosomal DNA.  
719 *Mycol Res* **107**:1435–1441.

720 56. Schuierer S, Carbone W, Knehr J, Petitjean V, Fernandez A, Sultan M, Roma G.  
721 2017. A comprehensive assessment of RNA-seq protocols for degraded and low-  
722 quantity samples. *BMC Genom* **18**:1–13.

723 57. Crusoe MR, Alameldin HF, Awad S, Boucher E, Caldwell A, Cartwright R,  
724 Charbonneau A, Constantinides B, Edverson G, Fay S, Fenton J, Fenzl T, Fish  
725 J, Garcia-Gutierrez L, Garland P, Gluck J, González I, Guermond S, Guo J,  
726 Gupta A, Herr JR, Howe A, Hyer A, Härpfer A, Irber L, Kidd R, Lin D, Lippi J,  
727 Mansour T, McA’Nulty P, McDonald E, Mizzi J, Murray KD, Nahum JR, Nanlohy  
728 K, Nederbragt AJ, Ortiz-Zuazaga H, Ory J, Pell J, Pepe-Rannek C, Russ ZN,  
729 Schwarz E, Scott C, Seaman J, Sievert S, Simpson J, Skennerton CT, Spencer  
730 J, Srinivasan R, Standage D, Stapleton JA, Steinman SR, Stein J, Taylor B,  
731 Trimble W, Wiencko HL, Wright M, Wyss B, Zhang Q, Zyme e, Brown CT. 2015.  
732 The khmer software package: enabling efficient nucleotide sequence analysis.  
733 *F1000Res* **4**:900.



- 734 58. Grabherr MG, Haas BJ, Yassour M, Levin JZ, Thompson DA, Amit I, Adiconis X,  
735 Fan L, Raychowdhury R, Zeng Q, Chen Z, Mauceli E, Hacohen N, Gnirke A,  
736 Rhind N, di Palma F, Birren BW, Nusbaum C, Lindblad-Toh K, Friedman N,  
737 Regev A. 2011. Trinity: reconstructing a full-length transcriptome without a  
738 genome from RNA-Seq data. *Nat Biotechnol* **29**:644–652.
- 739 59. Mikheenko A, Prjibelski A, Saveliev V, Antipov D, Gurevich A. 2018. Versatile  
740 genome assembly evaluation with QUAST-LG. *Bioinformatics* **34**:i142–i150.
- 741 60. Seppy M, Manni M, Zdobnov EM. 2019. BUSCO: Assessing genome assembly  
742 and annotation completeness. In: Kollmar M (eds) Gene Prediction. Methods in  
743 Molecular Biology, vol 1962. Humana, New York, NW.
- 744 61. Langmead B, Salzberg SL. 2012. Fast gapped-read alignment with Bowtie 2. *Nat*  
745 *Methods* **9**:357–359.
- 746 62. Li B, Dewey CN. 2011. RSEM: accurate transcript quantification from RNA-Seq  
747 data with or without a reference genome. *BMC Bioinform* **12**:323.
- 748 63. Robinson MD, McCarthy DJ, Smyth GK. 2010. edgeR: a Bioconductor package  
749 for differential expression analysis of digital gene expression data. *Bioinformatics*  
750 **26**:139–140.
- 751 64. Robinson MD, Oshlack A. 2010. A scaling normalization method for differential  
752 expression analysis of RNA-seq data. *Genome Biol* **11**:R25.
- 753 65. Li H, Handsaker B, Wysoker A, Fennell T, Ruan J, Homer N, Marth G, Abecasis  
754 G, Durbin R, 1000 Genome Project Data Processing Subgroup. 2009. The  
755 Sequence Alignment/Map format and SAMtools. *Bioinformatics* **25**:2078–2079.

- 756 66. Bryant DM, Johnson K, DiTommaso T, Tickle T, Brian Couger M, Payzin-Dogru  
757 D, Lee TJ, Leigh ND, Kuo T-H, Davis FG, Bateman J, Bryant S, Guzikowski AR,  
758 Tsai SL, Coyne S, Ye WW, Freeman RM, Jr, Peshkin L, Tabin CJ, Regev A,  
759 Haas BJ, Whited JL. 2017. A tissue-mapped azolotl de novo transcriptome  
760 enables identification of limb regeneration factors. *Cell Rep* **18**:P762–P776.
- 761 67. Camacho C, Coulouris G, Avagyan V, Ma N, Papadopoulos J, Bealer K, Madden  
762 TL. 2009. BLAST+: architecture and application. *BMC Bioinform* **10**:421.
- 763 68. Wheeler TJ, Eddy SR. 2013. nhmmer: DNA homology search with profile HMMs.  
764 *Bioinformatics* **29**:3487–3489.
- 765 69. Finn RD, Bateman A, Clements J, Coggill P, Eberhardt RY, Eddy SR, Heger A,  
766 Hetherington K, Holm L, Mistry J, Sonnhammer ELL, Tate J, Punta M. 2014.  
767 Pfam: the protein families database. *Nucleic Acids Res* **42**:D222–D230.
- 768 70. Ashburner M, Ball CA, Blake JA, Botstein D, Butler H, Cherry JM, Davis AP,  
769 Dolinski K, Dwight SS, Eppig JT, Harris MA, Hill DP, Issel-Tarver L, Kasarskis A,  
770 Lewis S, Matese JC, Richardson JE, Ringwald M, Rubin GM, Sherlock G. 2000.  
771 Gene Ontology: tool for the unification of biology. *Nat Genet* **25**:25–29.
- 772 71. Kanehisa M, Goto S. 2000. KEGG: Kyoto Encyclopedia of Genes and Genomes.  
773 *Nucleic Acids Res* **28**:27–30.
- 774 72. Kanehisa M. 2019. Toward understanding the origin and evolution of cellular  
775 organisms. *Protein Sci* **28**:1947–1951.
- 776 73. Kanehisa M, Furumichi M, Sato Y, Ishiguro-Watanabe M, Tanabe M. 2021.  
777 KEGG: integrating viruses and cellular organisms. *Nucleic Acids Res* **49**:D545–  
778 D551.

- 779 74. Zhang H, Yohe T, Huang L, Entwistle S, Wu P, Yang Z, Busk PK, Xu Y, Yin Y.  
780 2018. dbCAN2: a meta server for automated carbohydrate-active enzyme  
781 annotation. *Nucleic Acids Res* **46**:W95–W101.
- 782 75. Miyauchi S, Kiss E, Kuo A, Drula E, Kohler A, Sánchez-García M, Morin E,  
783 Andreopoulos B, Barry KW, Bonito G, Buée M, Carver A, Chen C, Cichocki N,  
784 Clum A, Culley D, Crous PW, Fauchery L, Girlanda M, Hayes RD, Kéri Z, LaButti  
785 K, Lipzen A, Lombard V, Magnuson J, Maillard F, Murat C, Nolan M, Ohm RA,  
786 Pangilinan J, Pereira MF, Perotto S, Peter M, Pfister S, Riley R, Sitrit Y, Stielow  
787 JB, Szöllösi G, Žifčáková L, Štursová M, Spatafora JW, Tedersoo L, Vaario LM,  
788 Yamada A, Yan M, Wang P, Xu J, Bruns T, Baldrian P, Vilgalys R, Dunand C,  
789 Henrissat B, Grigoriev IV, Hibbett D, Nagy LG, Martin FM. 2020. Large-scale  
790 genome sequencing of mycorrhizal fungi provides insights into the early evolution  
791 of symbiotic traits. *Nat Commun* **11**:5125.
- 792 76. Steindorff AS, Carver A, Calhoun S, Stillman K, Liu H, Lipzen A, He G, Yan M,  
793 Pangilinan J, LaButti K, Ng V, Bruns TD, Grigoriev IV. 2020. Comparative  
794 genomics of pyrophilous fungi reveals a link between fire events and  
795 developmental genes. *Environ Microbiol* **23**:99–109.
- 796 77. Ruiz-Dueñas FJ, Barrasa JM, Sánchez-García M, Camarero S, Miyauchi S,  
797 Serrano A, Linde D, Babiker R, Drula E, Ayuso-Fernández I, Pacheco R, Padilla  
798 G, Ferreira P, Barriuso J, Kellner H, Castanera R, Alfaro M, Ramirez L, Pisabarro  
799 AG, Riley R, Kuo A, Andreopoulos W, LaButti K, Pangilinan J, Tritt A, Lipzen A,  
800 He G, Yan M, Ng V, Grigoriev IV, Cullen D, Martin F, Rosso MN, Henrissat B,  
801 Hibbett D, Martínez AT. 2020. Genomic analysis enlightens Agaricales lifestyle

- 802 evolution and increasing peroxidase diversity. *Mol Biol Evol*
- 803 doi:10.1093/molbev/msaa301.
- 804 78. Blin K, Shaw S, Steinke K, Villebro R, Ziemert N, Yup Lee S, Medema MH,
- 805 Weber T. 2019. antiSMASH 5.0: updates to the secondary metabolite genome
- 806 mining pipeline. *Nucleic Acids Res* **47**:W81–W87.
- 807 79. Collins C, Keane TM, Turner DJ, O’Keeffe G, Fitzpatrick DA, Doyle S. 2013.
- 808 Genomic and proteomic dissection of the ubiquitous plant pathogen, *Armillaria*
- 809 *mellea*: Toward a new infection model system. *J Proteome Res* **12**:2552–2570.
- 810 80. Floudas D, Held BW, Riley R, Nagy LG, Koehler G, Ransdell AS, Younus H,
- 811 Chow J, Chiniquy J, Lipzen A, Tritt A, Sun H, Haridas S, LaButtie K, Ohm RA,
- 812 Kües U, Blanchette RA, Grigoriev IV, Minto RE, Hibbett DS. 2015. Evolution of
- 813 novel wood decay mechanisms in Agaricales revealed by the genome
- 814 sequences of *Fistulina hepatica* and *Cylindrobasidium torrendii*. *Fungal Genet*
- 815 *Biol* **76**:78–92.
- 816 81. Koch RA, Yoon GM, Arayal UK, Lail K, Amirebrahimi M, LaButti K, Lipzen A,
- 817 Riley R, Barry K, Henrissat B, Grigoriev IV, Herr JR, Aime MC. Symbiotic
- 818 nitrogen fixation in the reproductive structures of a basidiomycete fungus. *Curr*
- 819 *Biol*, Accepted.
- 820 82. Katoh K, Standley DM. 2013. MAFFT multiple sequence alignment software
- 821 version 7: improvements in performance and usability. *Mol Biol Evol* **30**:772–780.
- 822 83. Castresana J. 2000. Selection of conserved blocks from multiple alignments for
- 823 their use in phylogenetic analysis. *Mol Biol Evol* **17**:540–552.

- 824 84. Kozlov AM, Darriba D, Flouri T, Morel B, Stamatakis A. 2019. RAxML-NG: a fast,  
825 scalable and user-friendly tool for maximum likelihood phylogenetic inference.  
826 *Bioinformatics* **35**:4453–4455.
- 827 85. Bengtsson-Palme J, Ryberg M, Hartmann M, Branco S, Wang Z, Godhe A, De  
828 Wit P, Sánchez-García M, Ebersberger I, de Sousa F, Amend A, Jumpponen A,  
829 Unterseher M, Kristiansson E, Abarenkov K, Bertrand YJK, Sanli K, Eriksson KM,  
830 Vik U, Veldre V, Nilsson RH. 2013. Improved software detection and extraction of  
831 ITS1 and ITS2 from ribosomal ITS sequences of fungi and other eukaryotes for  
832 analysis of environmental sequencing data. *Methods Ecol Evol* **4**:914–919.
- 833 86. Guo T, Wang HC, Xue WQ, Zhao J, Yang ZL. 2016. Phylogenetic analyses of  
834 *Armillaria* reveal at least 15 phylogenetic lineages in China, seven of which are  
835 associated with cultivated *Gastrodia elata*. *PLoS One* **11**:e0154794.
- 836 87. Coetzee MPA, Wingfield BD, Harrington TC, Dalevi D, Coutinho TA, Wingfield  
837 MJ. 2000. Geographical diversity of *Armillaria mellea* s. s. based on phylogenetic  
838 analysis. *Mycologia* **92**:105–113.
- 839 88. Coetzee MPA, Wingfield BD, Bloomer P, Wingfield MJ. 2005. Phylogenetic  
840 analyses of DNA sequences reveal species partitions amongst isolates of  
841 *Armillaria* from Africa. *Mycol Res* **109**:1223–1234.
- 842 89. Schneider-Maunoury L, Deveau A, Moreno M, Todesco F, Belmondo S, Murat C,  
843 Courty P-E, Jąkalski M, Selosse M-A. 2020. Two ectomycorrhizal truffles, *Tuber*  
844 *melanosporum* and *T. aestivum*, endophytically colonise roots of non-  
845 ectomycorrhizal plants in natural environments. *New Phytol* **225**:2542–2556.

- 846 90. Coetzee MPA, Bloomer P, Wingfield MJ, Wingfield BD. 2011. Paleogene  
847 radiation of a plant pathogenic mushroom. *PLoS One* **6**:e28545.
- 848 91. Osmundson TW, Robert VA, Schoch CL, Baker LJ, Smith A, Robich G, Mizzan L,  
849 Garbelotto MM. 2013. Filling gaps in biodiversity knowledge for macrofungi:  
850 contributions and assessment of an herbarium collection DNA barcode  
851 sequencing project. *PLoS One* **8**:e62419.
- 852 92. Kasper-Pakosz R, Pietras M, Łuczaj Ł. 2016. Wild and native plants and  
853 mushrooms sold in the open-air markets of south-eastern Poland. *J Ethnobiol*  
854 *Ethnomed* **12**:45.
- 855 93. Hughes KW, Petersen RH, Lodge DJ, Bergemann SE, Baumgartner K, Tulloss  
856 RE, Lickey E, Cifuentes J. 2013. Evolutionary consequences of putative intra-  
857 and interspecific hybridization in agaric fungi. *Mycologia* **105**:1577–1594.
- 858 94. Potyralska A, Schmidt O, Moreth U, Łakomy P, Siwecki R. 2002. rDNA-ITS  
859 sequence of *Armillaria* species and a specific primer for *A. mellea*. *For Genet*  
860 **9**:119–124.
- 861 95. Ortega A, Moreno G, Platas G, Pelaez F. 2008. A new *Armillaria mellea* variant  
862 from tops of coastal sand dunes in southern Spain. *Mycotaxon* **104**:349–364.
- 863 96. Vu D, Groenewald M, de Vries M, Gehrman T, Stielow B, Eberhardt U, Al-Hatmi  
864 A, Groenewald JZ, Cardinali G, Houbraken J, Boekhout T, Crous PW, Robert V,  
865 Verkley GJM. 2019. Large-scale generation and analysis of filamentous fungal  
866 DNA barcodes boosts coverage for kingdom fungi and reveals thresholds for  
867 fungal species and higher taxon delimitation. *Stud Mycol* **92**:135–154.

- 868 97. Binder M, Hibbett DS, Wang Z, Farnham WF. 2006. Evolutionary relationships of  
869 *Mycaureola dilseae* (Agaricales), a basidiomycete pathogen of a subtidal  
870 rhodophyte. *Am J Bot* **93**:547–556.
- 871 98. Haelewaters D, Dirks AC, Kappler LA, Mitchell JK, Quijada L, Vandegrift R,  
872 Buyck B, Pfister DH. 2018. A preliminary checklist of fungi at the Boston Harbor  
873 Islands. *Northeast Nat* **25**:45–76.
- 874 99. Kim M-S, Klopfenstein NB, Hanna JW, McDonald GI. 2006. Characterization of  
875 North American *Armillaria* species: genetic relationships determined by ribosomal  
876 DNA sequences and AFLP markers. *For Path* **36**:145–164.
- 877 100. Schnabel G, Ash JS, Bryson PK. 2005. Identification and characterization  
878 of *Armillaria tabescens* from the southeastern United States. *Mycol Res*  
879 **109**:1208–1222.
- 880  
881  
882  
883  
884  
885  
886  
887  
888  
889  
890  
891

892 TABLE 1 Ten most highly expressed *E. abortivum* genes in sporocarps and carpophoroids

| 893 | Gene             | Annotation            | Cond. | C (TMM) | S (TMM) | logFC | <i>q</i> -value        |
|-----|------------------|-----------------------|-------|---------|---------|-------|------------------------|
| 894 | ENT_DN2762_c0_g3 | Oxalate decarboxylase | C     | 68,724  | 238     | -8.5  | $4.5 \times 10^{-317}$ |
| 895 | ENT_DN1212_c0_g1 | Hypothetical protein  | C/S   | 55,939  | 12,590  | -2.5  | $4.3 \times 10^{-49}$  |
| 896 | ENT_DN3063_c0_g2 | Oxalate decarboxylase | C     | 48,157  | 135     | -8.8  | 0                      |
| 897 | ENT_DN1952_c0_g2 | Acid phosphatase      | C     | 19,999  | 677     | -5.2  | $1.3 \times 10^{-169}$ |
| 898 | ENT_DN4045_c1_g1 | Hypothetical protein  | C     | 19,965  | 3,374   | -2.9  | $3.4 \times 10^{-63}$  |
| 899 | ENT_DN5742_c0_g1 | Hypothetical protein  | C     | 11,229  | 23      | -9.3  | $6.9 \times 10^{-220}$ |
| 900 | ENT_DN4332_c0_g1 | Hypothetical protein  | C     | 11,038  | 607     | -4.5  | $4.7 \times 10^{-77}$  |
| 901 | ENT_DN1952_c0_g1 | Acid phosphatase      | C     | 10,766  | 673     | -4.4  | $1.9 \times 10^{-122}$ |
| 902 | ENT_DN2936_c0_g2 | Hypothetical protein  | C     | 9,212   | 3,686   | NS    |                        |
| 903 | ENT_DN3086_c0_g1 | Hypothetical protein  | C     | 9,076   | 1,563   | -2.9  | $2.2 \times 10^{-62}$  |
| 904 | ENT_DN1375_c0_g1 | Trehalase             | S     | 1,934   | 17,890  | 2.9   | $6.5 \times 10^{-37}$  |
| 905 | ENT_DN5247_c0_g3 | Hypothetical protein  | S     | 2,718   | 7,204   | NS    |                        |
| 906 | ENT_DN761_c0_g2  | Hypothetical protein  | S     | 7,405   | 6,918   | NS    |                        |
| 907 | ENT_DN521_c0_g2  | Hypothetical protein  | S     | 6,045   | 6,424   | NS    |                        |
| 908 | ENT_DN852_c0_g1  | Hypothetical protein  | S     | 123     | 5,429   | 5.1   | $2.0 \times 10^{-142}$ |
| 909 | ENT_DN3621_c0_g2 | RNA polymerase        | S     | 1,977   | 5,138   | NS    |                        |
| 910 | ENT_DN6707_c0_g1 | Hypothetical protein  | S     | 1,654   | 5,027   | NS    |                        |
| 911 | ENT_DN2379_c0_g1 | TPR-like protein      | S     | 4,862   | 5,017   | NS    |                        |
| 912 | ENT_DN466_c0_g1  | Auxin efflux carrier  | S     | 1,205   | 4,333   | NS    |                        |

913 Cond.: condition in which each gene was most highly expressed, referring to either the carpophoroids (C) or sporocarps (S). NS: not  
 914 significantly differentially expressed in either condition. Negative logFC values are significantly differentially upregulated in the carpophoroid,  
 915 whereas positive values are significantly differentially upregulated in the sporocarp. Transcripts discussed in the text include two oxalate  
 916 decarboxylases (ENT\_DN2762\_c0\_g3, ENT\_DN3063\_c0\_g2), three  $\beta$ -trefoil-type lectins (ENT\_DN4359\_c0\_g1, ENT\_DN1877\_c0\_g1,  
 917 ENT\_DN4255\_c0\_g1), three ABC transporters (ENT\_DN1537\_c0\_g1, ENT\_DN189\_c0\_g1, ENT\_DN3860\_c0\_g1), two chitinases  
 918 (ENT\_DN2096\_c0\_g1, ENT\_DN4507\_c0\_g3) and 14 MFS transcripts (ENT\_DN409\_c0\_g1, ENT\_DN1954\_c0\_g1, ENT\_DN1998\_c0\_g1,  
 919 ENT\_DN2070\_c0\_g1, ENT\_DN2744\_c0\_g1, ENT\_DN3292\_c0\_g1, ENT\_DN3474\_c0\_g1, ENT\_DN3861\_c0\_g1, ENT\_DN3943\_c0\_g1,  
 920 ENT\_DN3943\_c0\_g2, ENT\_DN3981\_c0\_g1, ENT\_DN4751\_c0\_g2, ENT\_DN6588\_c0\_g1, ENT\_DN6695\_c0\_g1).



921 TABLE 2 Ten most highly expressed *Armillaria* genes in sporocarps and carpophoroids

| 922 | Gene              | Annotation                     | Cond. | C (TMM) | S (TMM) | logFC | <i>q</i> -value        |
|-----|-------------------|--------------------------------|-------|---------|---------|-------|------------------------|
| 923 | ARM_DN1755_c2_g1  | Cell wall galactomannoprotein  | S     | 0       | 36,479  | 13.5  | 4.0×10 <sup>-182</sup> |
| 924 | ARM_DN3840_c0_g1  | Serine carboxypeptidase        | S     | 12      | 29,472  | 6.7   | 7.9×10 <sup>-100</sup> |
| 925 | ARM_DN22943_c1_g1 | Rab geranylgeranyltransferase  | S     | 21      | 18,649  | 5.1   | 3.8×10 <sup>-89</sup>  |
| 926 | ARM_DN1737_c0_g1  | LysM-domain-containing protein | S     | 0       | 14,557  | 15.9  | 3.0×10 <sup>-159</sup> |
| 927 | ARM_DN1699_c3_g1  | Hypothetical protein           | S     | 9       | 12,848  | 5.8   | 1.6×10 <sup>-94</sup>  |
| 928 | ARM_DN1314_c0_g1  | Chondroitin AC/alginate lyase  | S     | 102     | 11,436  | 2.2   | 3.7×10 <sup>-25</sup>  |
| 929 | ARM_DN20980_c0_g1 | Glycopeptide                   | S     | 0       | 10,449  | 15.4  | 3.4×10 <sup>-139</sup> |
| 930 | ARM_DN8135_c0_g1  | Rasp f 7 allergen              | S     | 0       | 9,014   | 11.5  | 1.8×10 <sup>-58</sup>  |
| 931 | ARM_DN4971_c0_g2  | Aldehyde dehydrogenase         | S     | 103     | 8,688   | NS    |                        |
| 932 | ARM_DN1205_c0_g1  | Hypothetical protein           | S/C   | 9,049   | 8,348   | -4.8  | 2.1×10 <sup>-74</sup>  |
| 933 | ARM_DN5170_c0_g1  | Hypothetical protein           | C     | 2,086   | 377     | -7.1  | 6.9×10 <sup>-150</sup> |
| 934 | ARM_DN23207_c0_g2 | Senescence-associated          | C     | 1,711   | 2,482   | -4.1  | 6.6×10 <sup>-61</sup>  |
| 935 | ARM_DN996_c0_g1   | Senescence-associated          | C     | 1,423   | 1,090   | -5.0  | 3.0×10 <sup>-73</sup>  |
| 936 | ARM_DN409_c1_g1   | Elongation factor 1-alpha      | C     | 769     | 1,154   | -4.1  | 4.0×10 <sup>-155</sup> |
| 937 | ARM_DN1893_c0_g1  | Hypothetical protein           | C     | 722     | 58      | -8.3  | 5.3×10 <sup>-109</sup> |
| 938 | ARM_DN693_c0_g1   | Hypothetical protein           | C     | 520     | 840     | -3.9  | 1.1×10 <sup>-48</sup>  |
| 939 | ARM_DN1222_c0_g1  | CYS3-cystathionine gamma-lyase | C     | 485     | 717     | -4.1  | 5.5×10 <sup>-27</sup>  |
| 940 | ARM_DN1146_c0_g4  | Heat shock protein 70          | C     | 431     | 2,361   | -2.2  | 1.7×10 <sup>-54</sup>  |
| 941 | ARM_DN3800_c0_g1  | ATP synthase F1                | C     | 300     | 4,686   | NS    |                        |

942 Cond.: condition in which each gene was most highly expressed, referring to either the carpophoroids (C) or sporocarps (S).

943 NS: not significantly differentially expressed in either condition. Negative logFC values are significantly differentially

944 upregulated in the carpophoroid, whereas positive values are significantly differentially upregulated in the sporocarp.

945 Transcripts discussed in the text were an isocitrate lyase (ARM\_DN1\_c7\_g1), two putative senescence-associated proteins

946 (ARM\_DN23207\_c0\_g2, ARM\_DN996\_c0\_g1), and a heat shock protein (ARM\_DN1146\_c0\_g4).

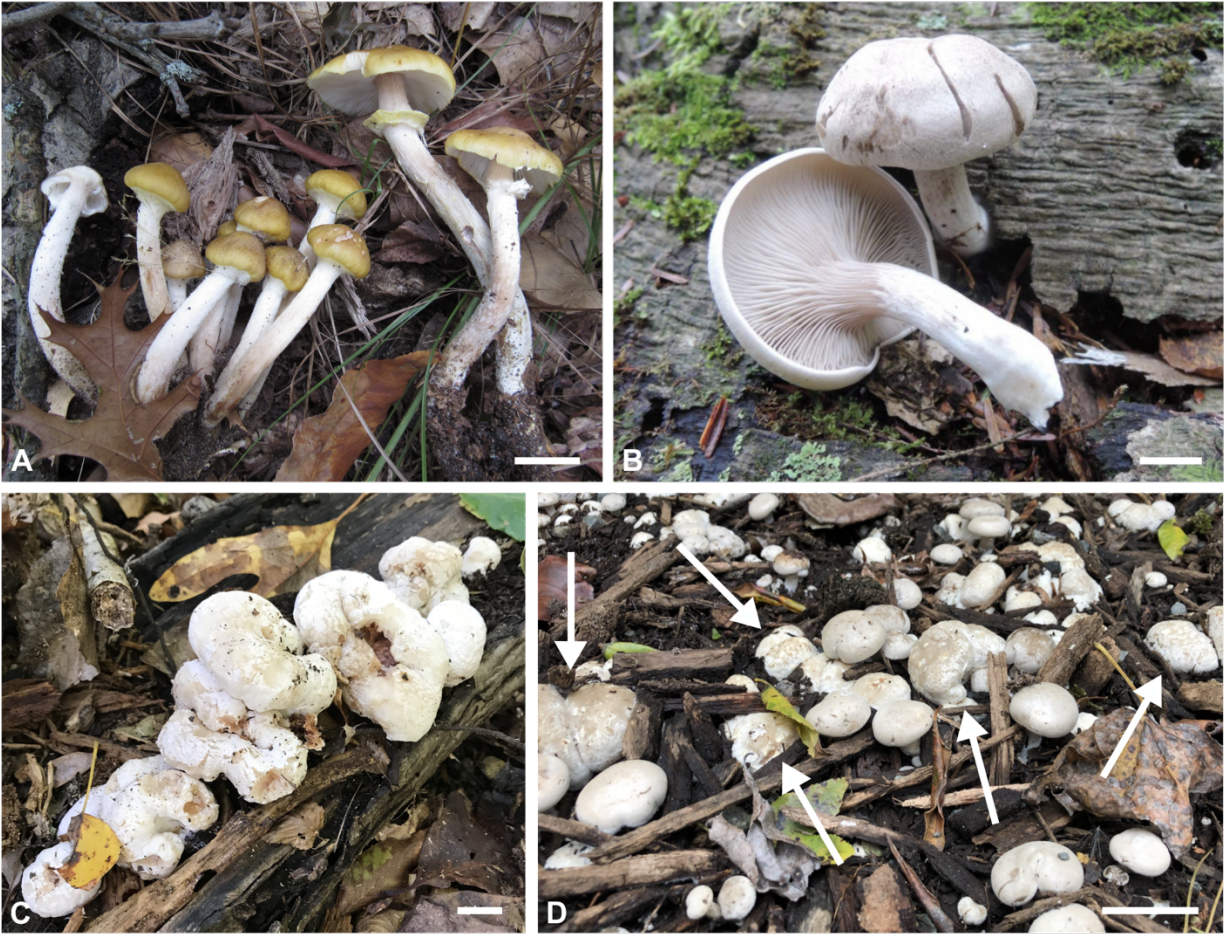

947

948 **FIG 1** The components of this fungal interaction in nature. (A) *Armillaria* sporocarps. (B)

949 *Entoloma abortivum* sporocarps; photo taken by Eva Skific. (C) Carpophoroids. (D) A

950 group of *E. abortivum* sporocarps and carpophoroids, with the carpophoroids indicated

951 by arrows; photo taken by Andrew Loyd. Scale bars in A–C are equal to 1 cm and in D

952 are equal to 10 cm.

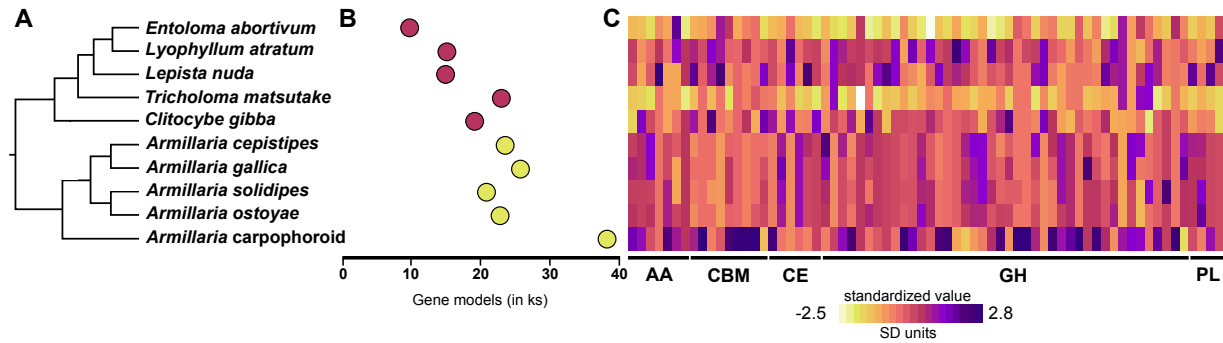

953

954 **FIG 2** Number of total gene models and gene copy numbers of CAZymes. (A) A  
955 representative phylogeny is a representation based off phylogenetic evidence from  
956 Sipos et al. (2017) and Dentinger et al. (2016). (B) Number of gene models in the  
957 transcriptome of the *Armillaria* and *E. abortivum* generated in this study, along with  
958 those of closely related species from previously generated genomic data. (C) Heat map  
959 showing gene copy numbers of plant cell wall degrading enzymes detected in the  
960 transcriptomes of *E. abortivum* and *Armillaria*, along with other closely related species.  
961 Abbreviations: AA: Auxiliary Activities; CBM: Carbohydrate-Binding Modules; CE:  
962 Carbohydrate Esterase; GH: Glycoside Hydrolase; PL: Polysaccharide Lyase.

963

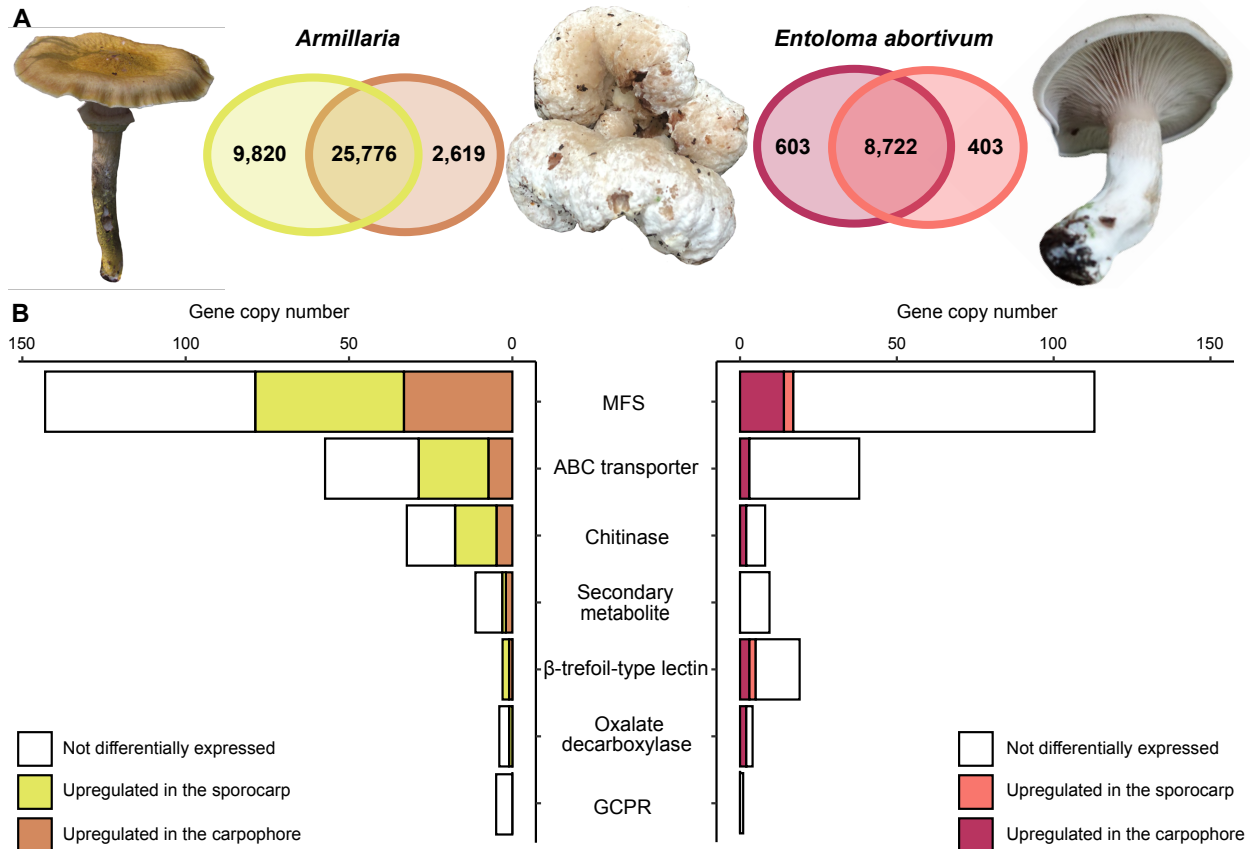

964

965 **FIG 3** Differentially expressed genes in the sporocarp and carpophoroid. (A) Venn  
 966 diagram showing the number of differentially expressed genes between the sporocarp  
 967 and carpophoroid in *Armillaria* and *E. abortivum*; photo of *E. abortivum* taken by Eva  
 968 Skific. (B) Bar graph showing the number of gene copies of genes important in  
 969 mycoparasitic interactions. The white portion of the bar shows the number of these  
 970 genes detected in the transcriptome but not differentially expressed, while the darker  
 971 colors (brown and purple, respectively) show the number of these genes that are  
 972 significantly upregulated by each species in the carpophoroid and the lighter colors  
 973 (yellow and coral, respectively) show the number of these genes that are significantly  
 974 upregulated by each species in their respective sporocarp.

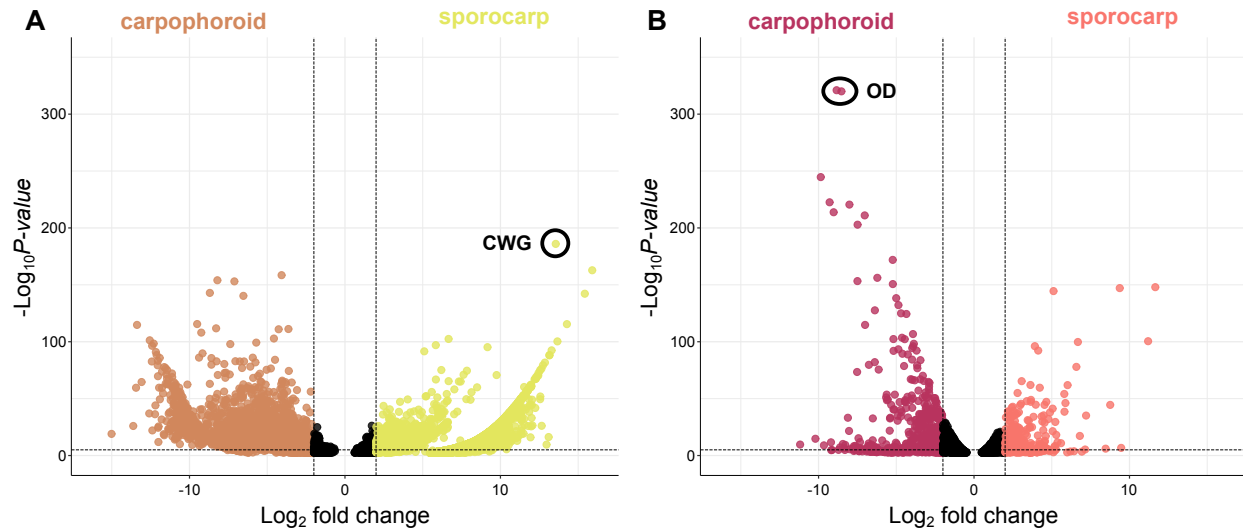

975

976 **FIG 4** Volcano plots. Each dot represents a gene plotted according to its logFC and the  
977  $-\log_{10}$  of its  $p$ -value. All genes with a  $q$ -value  $< 0.05$  are shown. Black dots represent a  
978 gene with a non-significant logFC ( $-2 < \log_{2}FC < 2$ ). (A) *Armillaria*. (B) *E. abortivum*. Dots  
979 with a black circle around them are annotated according to the abbreviations OD:  
980 oxalate decarboxylase; CWG: cell wall galactomannoprotein.

981



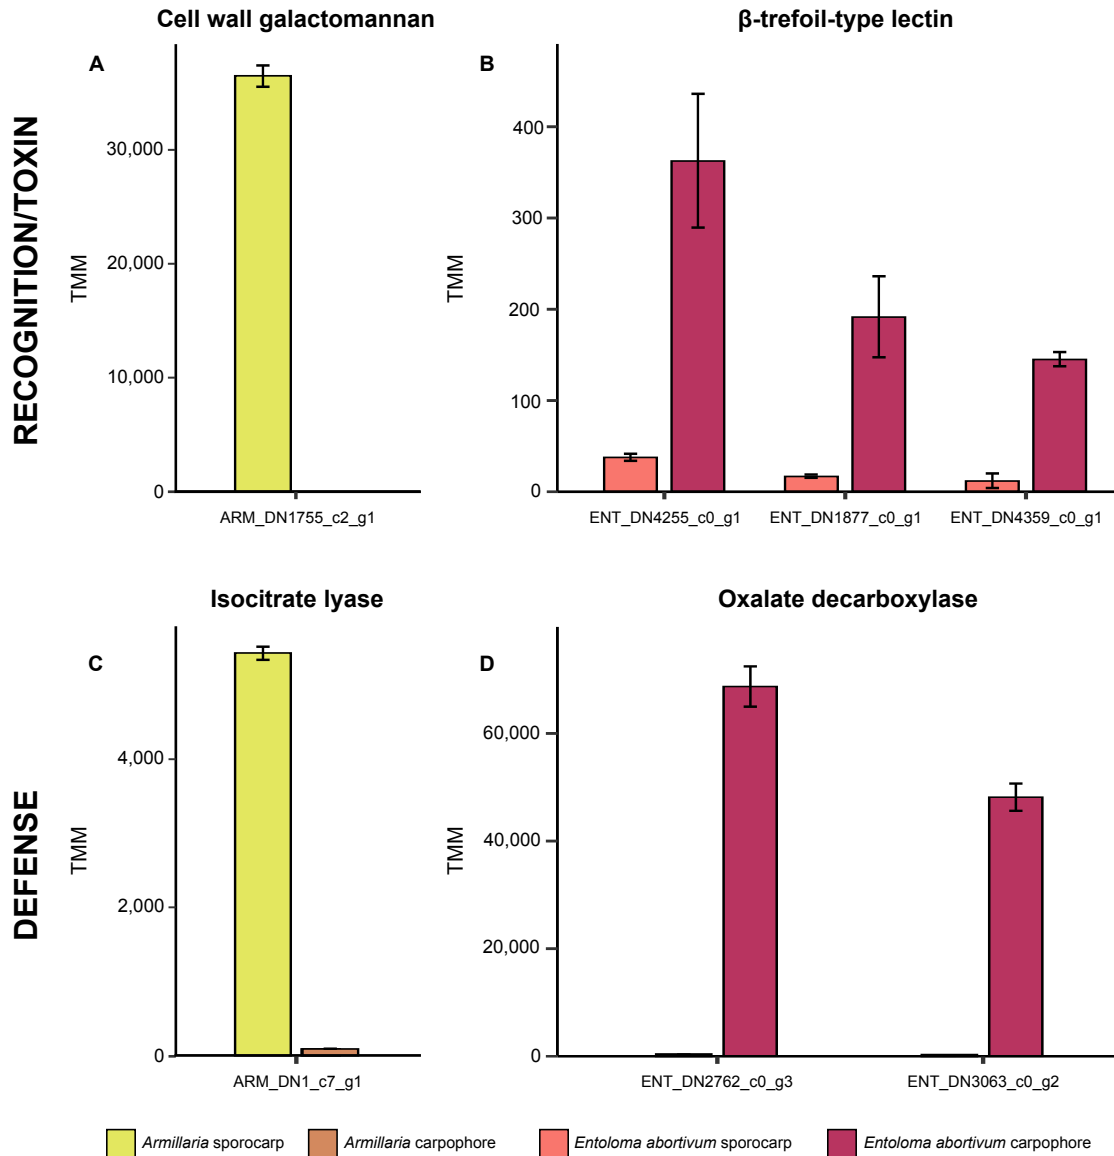

982

983 **FIG 5** Genes in both *Armillaria* and *E. abortivum* that are putatively important in the  
 984 recognition and defense responses during this mycoparasitic interaction. (A) One  
 985 *Armillaria* cell wall galactomannan that is significantly upregulated in the sporocarp; (B)  
 986 three *E. abortivum*  $\beta$ -trefoil-type lectins that are significantly upregulated in the  
 987 carpophoroid; (C) one *Armillaria* gene that codes for isocitrate lyase that is significantly  
 988 upregulated in their sporocarps; and (D) two *E. abortivum* genes that code for oxalate

989 decarboxylases that are significantly upregulated in the carpophoroids. All results are

990 shown as means  $\pm$  standard error of the mean.

991

992

993

994

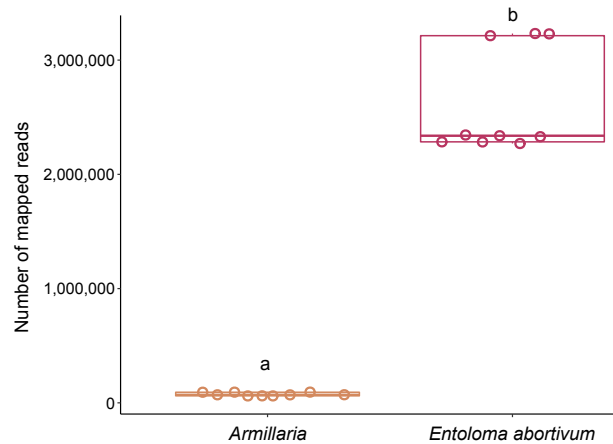

995

996 **FIG 6** Boxplots of number of carpophoroid reads that mapped to *Armillaria* and *E.*

997 *abortivum* when MAPQ = 30. Individual data points are indicated for each species with

998 an open circle. The continuous line within each box represents the mean number of

999 mapped reads. Species labeled with different letters (a to b) have a statistically

1000 significant ( $p < 0.05$ ) different number of mapped reads in the carpophoroid.

1001

1002

1003



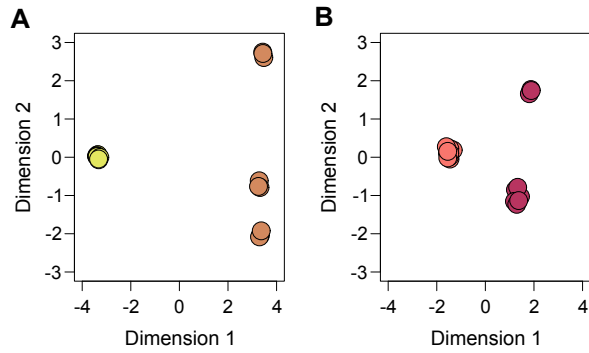

1004

1005 **FIG 7** Multidimensional scaling plot of distances between gene expression profiles for  
1006 each sample. (A) *Armillaria* sporocarps and carpophoroids. (B) *E. abortivum* sporocarps  
1007 and carpophoroids. For both figures, the lighter colors on the left represent the  
1008 sporocarps, while the darker colors on the right represent the carpophoroids.

1009

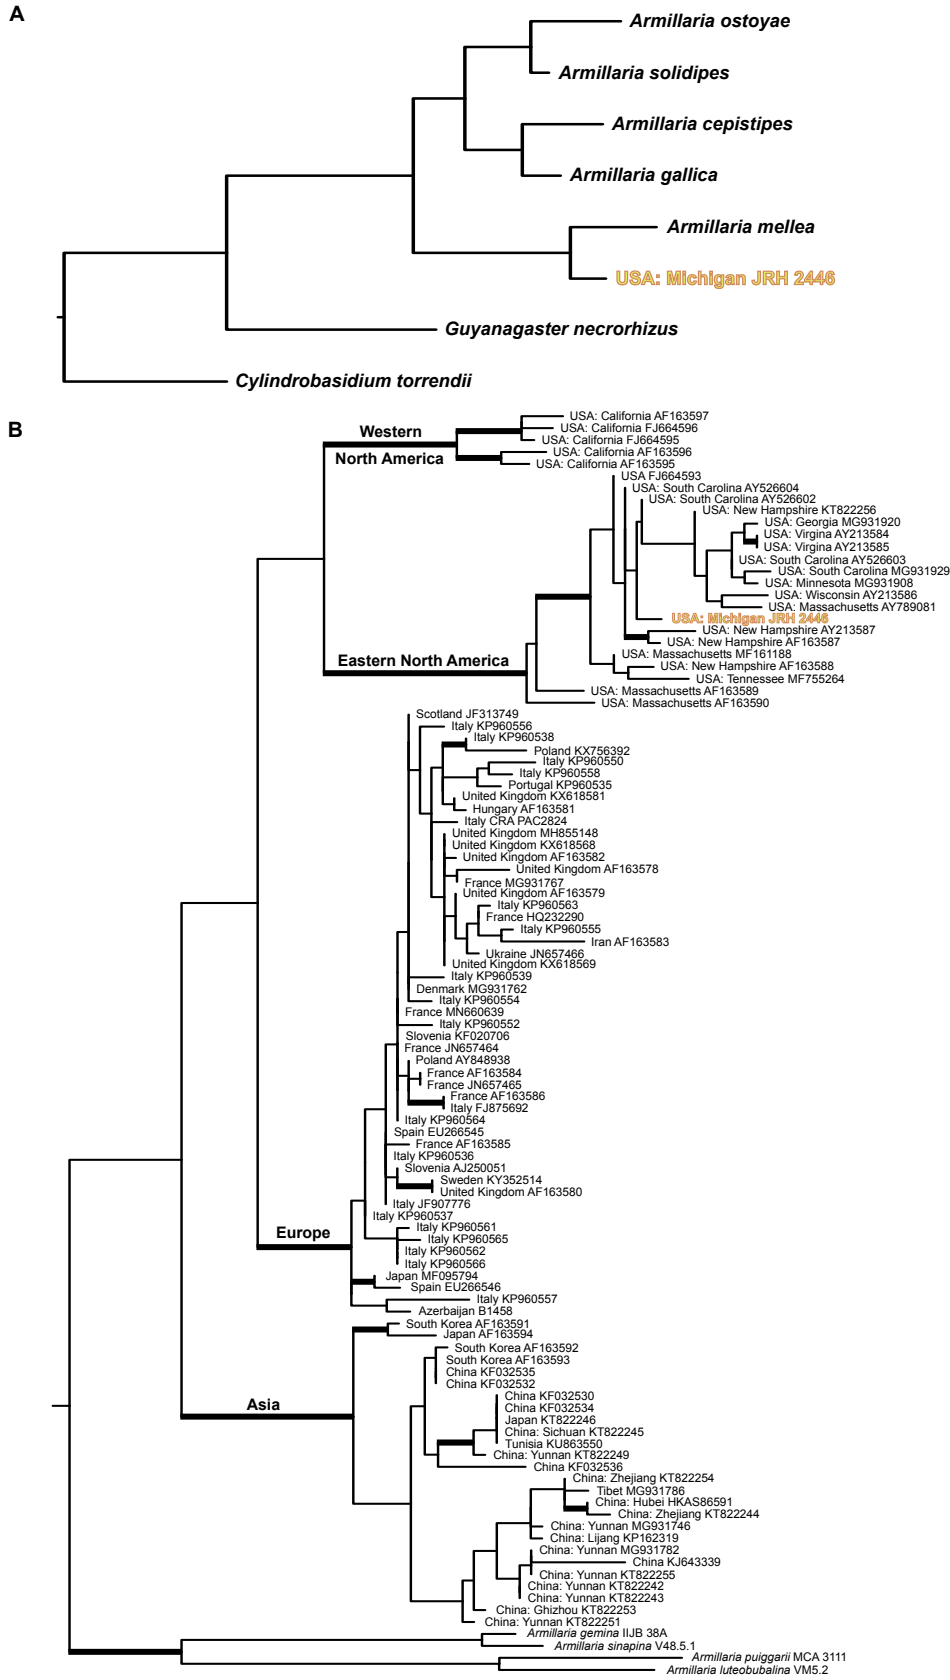

1011 **FIG 8** Phylogenetic placement of the *Armillaria* species used in this analysis. (A)  
1012 Maximum likelihood phylogeny of *Armillaria* species and *Guyanagaster necrorhizus*  
1013 generated from the analysis of 100 random BUSCOs. The outgroup taxon is  
1014 *Cylindrobasidium torrendii*. Each node is fully supported with 100% bootstrap  
1015 supported. (B) Maximum likelihood phylogeny of *Armillaria mellea* phylogenetic tree  
1016 generated from the analysis of the ITS region. Branches with 70% or more bootstrap  
1017 support are thickened. Outgroup taxa include *A. gemina*, *A. luteobubalina*, *A. puiggarii*  
1018 and *A. sinapina*. The *Armillaria* specimen analyzed during this study is in bold and  
1019 yellow in both phylogenies.  
1020  
1021
